# Supplementary material for: Adaptive Responses of Citrus grandis Leaves to Copper Toxicity Revealed by RNA-Seq and Physiology
Source: MDPI journal article supplement (doi:10.3390/ijms222112023), 2021-11-06
Supplement: s1 [file s1]

## Tables S1-S2

**Table S1.** Summary of the RNA-Seq data collected from leaves of *C. grandis* seedlings treated with 0.5 (control) and 400 (Cu-toxicity)  $\mu\text{M}$  Cu. Q20 and Q30 mean sequencing error rates lower than 1% and 1‰, respectively.

| <b>Samples treatment</b> | <b>Raw reads</b> | <b>Clean reads (%)</b> | <b>Clean bases (G)</b> | <b>Error rate (%)</b> | <b>Q20 (%)</b> | <b>Q30 (%)</b> | <b>Adapter (%)</b> | <b>N (%)</b> | <b>Low quality (%)</b> | <b>GC content (%)</b> |
|--------------------------|------------------|------------------------|------------------------|-----------------------|----------------|----------------|--------------------|--------------|------------------------|-----------------------|
| Control 1                | 47326492         | 46291438 (97.8)        | 6.94                   | 0.02                  | 98.09          | 94.24          | 2.06               | 0.003        | 0.12                   | 43.44                 |
| Control 2                | 54676210         | 53395986 (97.7)        | 8.01                   | 0.02                  | 98.12          | 94.42          | 2.21               | 0.003        | 0.13                   | 43.32                 |
| Control 3                | 49156910         | 47471830 (96.6)        | 7.12                   | 0.02                  | 98.03          | 94.07          | 3.32               | 0.003        | 0.10                   | 43.42                 |
| Cu-toxicity 1            | 51570710         | 50549974 (98.0)        | 7.58                   | 0.02                  | 97.5           | 92.73          | 1.90               | 0.000        | 0.08                   | 43.63                 |
| Cu-toxicity 2            | 54513246         | 53349850 (97.9)        | 8.00                   | 0.02                  | 97.11          | 91.9           | 2.01               | 0.005        | 0.12                   | 43.55                 |
| Cu-toxicity 3            | 55041176         | 53936214 (98.0)        | 8.09                   | 0.02                  | 97.22          | 92.12          | 1.89               | 0.005        | 0.11                   | 43.78                 |

**Table S2.** Summary of clean reads and genes mapped to the reference genome from leaves of *C. grandis* seedlings treated with 0.5 and 400  $\mu$ M Cu.

| Samples       | Total Reads | Reads mapped      | Unique mapped     | Multi mapped    | Read1 mapped      | Read2 mapped      | '+' mapped       | '-' mapped        |
|---------------|-------------|-------------------|-------------------|-----------------|-------------------|-------------------|------------------|-------------------|
| Control 1     | 46291438    | 43438909 (93.84%) | 42075051 (90.89%) | 1998815 (2.95%) | 20941450 (45.24%) | 21133601 (45.65%) | 21037984(45.45%) | 21037067 (45.44%) |
| Control 2     | 53395986    | 49960804 (93.57%) | 48383775 (90.61%) | 2359390 (2.95%) | 23999749 (44.95%) | 24384026 (45.67%) | 24194985(45.31%) | 24188790 (45.30%) |
| Control 3     | 47471830    | 44549092 (93.84%) | 43209659 (91.02%) | 1910286 (2.82%) | 21508433 (45.31%) | 21701226 (45.71%) | 21599098(45.50%) | 21610561 (45.52%) |
| Cu-toxicity 1 | 50549974    | 48205117 (95.36%) | 46793588 (92.57%) | 2059646 (2.79%) | 23443675 (46.38%) | 23349913 (46.19%) | 23381225(46.25%) | 23412363 (46.32%) |
| Cu-toxicity 2 | 53349850    | 50499175 (94.66%) | 48983206 (91.82%) | 2299373 (2.84%) | 24605800 (46.12%) | 24377406 (45.69%) | 24466437(45.86%) | 24516769 (45.95%) |
| Cu-toxicity 3 | 53936214    | 51150060 (94.83%) | 49625548 (92.01%) | 2257448 (2.83%) | 24911486 (46.19%) | 24714062 (45.82%) | 24784662(45.95%) | 24840886(46.06%)  |
