# Supplementary material for: Adaptive Responses of Citrus grandis Leaves to Copper Toxicity Revealed by RNA-Seq and Physiology
Source: MDPI journal article supplement (doi:10.3390/ijms222112023), 2021-11-06
Supplement: s1 [file s1]

**Figure S1**

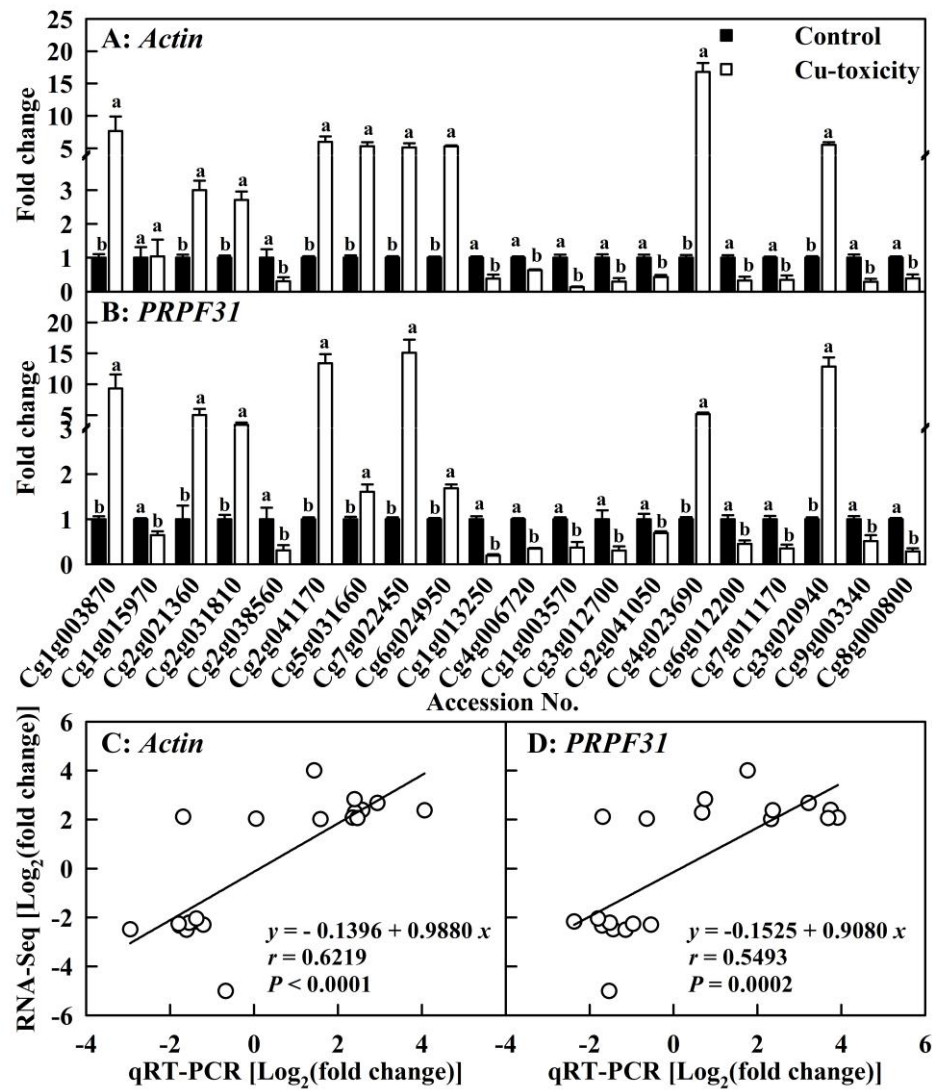

**Figure S1.** qRT-PCR validation of 20 DEGs using *actin* (A) and *PRPF31* (B) as internal standards, and the correlation analysis of RNA-Seq data and qRT-PCR results using *actin* (C) and *PRPF31* (D) as internal standards. Bars represent means  $\pm$  SE of 2 technique and 3 biological replicates. For the same genes, different letters above the bars indicate a significant difference at  $P < 0.05$ . For (C) and (D), RNA-Seq data came from Table S5.
