# Supplementary material for: Adaptive Responses of Citrus grandis Leaves to Copper Toxicity Revealed by RNA-Seq and Physiology
Source: MDPI journal article supplement (doi:10.3390/ijms222112023), 2021-11-06
Supplement: s1 [file s1]

## Tables S9-18

**Table S9.** DEGs involved in cell wall metabolism in leaves of *C. grandis* seedlings exposed to Cu-toxicity

| Accession No.                       | KEGG                                                                            | Swiss-Prot                                                   | Log <sub>2</sub> (FC) |
|-------------------------------------|---------------------------------------------------------------------------------|--------------------------------------------------------------|-----------------------|
| Plant-type cell wall (GO:0009505)   |                                                                                 |                                                              |                       |
| Cg1g015520                          | LRR receptor-like serine/threonine-protein kinase FLS2 [EC:2.7.11.1]            | LRR receptor-like serine/threonine-protein kinase GSO2       | -1.602                |
| Cg4g008420                          | LRR receptor-like serine/threonine-protein kinase FLS2 [EC:2.7.11.1]            | Leucine-rich repeat extensin-like protein 4                  | -1.176                |
| Cg2g024270                          | Interleukin-1 receptor-associated kinase 4 [EC:2.7.11.1]                        | Wall-associated receptor kinase-like 2                       | -1.330                |
| Cg1g024330                          | Beta-galactosidase [EC:3.2.1.23]                                                | Beta-galactosidase 10                                        | -1.209                |
| Cg3g014760                          | Nucleoporin SEH1                                                                | Protein EXORDIUM-like 2                                      | -2.037                |
| CgUng004910                         | Nucleoporin SEH1                                                                | Protein EXORDIUM-like 2                                      | -2.760                |
| Cg4g019830                          | Heparanase [EC:3.2.1.166]                                                       | Heparanase-like protein 3                                    | -1.388                |
| Cg5g008280                          | Saccharopepsin [EC:3.4.23.25]                                                   | Probable aspartyl protease At4g16563 {ECO:0000305}           | -1.082                |
| Cg7g011170                          | Alpha-mannosidase [EC:3.2.1.24]                                                 | Probable alpha-mannosidase At5g13980 {ECO:0000305}           | -2.225                |
| Cg7g014460                          | Alpha-D-xyloside xylohydrolase [EC:3.2.1.177]                                   | Alpha-xylosidase 1                                           | -1.159                |
| Cg9g001580                          | Xylan 1,4-beta-xylosidase [EC:3.2.1.37]                                         | Beta-D-xylosidase 1                                          | -1.581                |
| Cg5g038180                          | Xylan 1,4-beta-xylosidase [EC:3.2.1.37]                                         | Probable beta-D-xylosidase 2                                 | -1.672                |
| Cg9g026970                          | O-palmitoleoyl-L-serine hydrolase [EC:3.1.1.98]                                 | Pectin acetyltransferase 9 {ECO:0000303 PubMed:25115560}     | -2.264                |
| Cg9g002460                          | Sucrose synthase [EC:2.4.1.13]                                                  | Sucrose synthase 2                                           | 3.483                 |
| Cell wall organization (GO:0071555) |                                                                                 |                                                              |                       |
| Cg1g015500                          | LRR receptor-like serine/threonine-protein kinase FLS2 [EC:2.7.11.1]            | LRR receptor-like serine/threonine-protein kinase FLS2       | -1.275                |
| Cg1g015520                          | LRR receptor-like serine/threonine-protein kinase FLS2 [EC:2.7.11.1]            | LRR receptor-like serine/threonine-protein kinase GSO2       | -1.602                |
| Cg4g008420                          | LRR receptor-like serine/threonine-protein kinase FLS2 [EC:2.7.11.1]            | Leucine-rich repeat extensin-like protein 4                  | -1.176                |
| Cg9g006130                          | LRR receptor-like serine/threonine-protein kinase FLS2 [EC:2.7.11.1]            | Leucine-rich repeat extensin-like protein 6                  | -2.603                |
| Cg2g040340                          | Protein transport protein SEC61 subunit alpha                                   | COBRA-like protein 10                                        | -2.721                |
| CgUng006010                         | Leucine-rich PPR motif-containing protein, mitochondrial                        | COBRA-like protein 1                                         | 9.115                 |
| Cg3g023440                          | Integrin-linked kinase-associated serine/threonine phosphatase 2C [EC:3.1.3.16] | Protein WALLS ARE THIN 1                                     | 2.919                 |
| Cg4g000800                          | Xyloglucan glycosyltransferase 4 [EC:2.4.1.-]                                   | Probable xyloglucan glycosyltransferase 5                    | 3.743                 |
| Cg1g007100                          | Xyloglucan:xyloglucosyl transferase [EC:2.4.1.207]                              | Probable xyloglucan endotransglucosylase/hydrolase protein 6 | -1.880                |
| Cg2g017560                          | Xyloglucan:xyloglucosyl transferase [EC:2.4.1.207]                              | Xyloglucan endotransglucosylase/hydrolase protein 9          | -2.685                |
| Cg2g020180                          | Omega-hydroxypalmitate O-feruloyl transferase [EC:2.3.1.188]                    | Omega-hydroxypalmitate O-feruloyl transferase                | -3.290                |

|                                     |                                                                            |                                                                      |        |
|-------------------------------------|----------------------------------------------------------------------------|----------------------------------------------------------------------|--------|
| Cg2g031930                          | F-box and leucine-rich repeat protein 2/20                                 | Putative pectinesterase/pectinesterase inhibitor 22                  | -1.492 |
| Cg1g013250                          | Pectinesterase [EC:3.1.1.11]                                               | Pectinesterase 3                                                     | -2.176 |
| Cg2g033370                          | Pectinesterase [EC:3.1.1.11]                                               | Probable pectinesterase/pectinesterase inhibitor 6                   | -1.299 |
| Cg4g018220                          | Pectinesterase [EC:3.1.1.11]                                               | Probable pectinesterase/pectinesterase inhibitor 54                  | -2.108 |
| Cg5g018160                          | Pectinesterase [EC:3.1.1.11]                                               | Probable pectinesterase/pectinesterase inhibitor 61                  | -1.288 |
| Cg9g026970                          | O-palmitoleoyl-L-serine hydrolase [EC:3.1.1.98]                            | Pectin acylesterase 9 {ECO:0000303 PubMed:25115560}                  | -2.264 |
| Cg2g040360                          | Pectinesterase [EC:3.1.1.11]                                               | Pectinesterase 2.2                                                   | 1.647  |
| Cg2g044240                          | DNA-directed RNA polymerase II subunit RPB1 [EC:2.7.7.6]                   | Glucan endo-1,3-beta-glucosidase 12                                  | 2.251  |
| Cg8g014060                          | Glucan endo-1,3-beta-glucosidase 1/2/3 [EC:3.2.1.39]                       | Glucan endo-1,3-beta-glucosidase 14                                  | 1.055  |
| Cg3g023860                          | Endoglucanase [EC:3.2.1.4]                                                 | Endoglucanase 10                                                     | 1.121  |
| Cg7g014460                          | Alpha-D-xyloside xylohydrolase [EC:3.2.1.177]                              | Alpha-xylosidase 1                                                   | -1.159 |
| Cg5g009980                          | UDP-glucose 4-epimerase [EC:5.1.3.2]                                       | Bifunctional UDP-glucose 4-epimerase and UDP-xylose 4-epimerase 1    | -1.862 |
| Cg5g000440                          | Abhydrolase domain-containing protein 5 [EC:2.3.1.51]                      | Probable lysophospholipase BODYGUARD 3 {ECO:0000303 PubMed:16415209} | 7.905  |
| Cg6g008750                          | Abhydrolase domain-containing protein 5 [EC:2.3.1.51]                      | Probable lysophospholipase BODYGUARD 4 {ECO:0000303 PubMed:16415209} | 2.244  |
| Cg5g030310                          | Cytochrome P450 family 71 subfamily A                                      | Cytochrome P450 83B1                                                 | 3.608  |
| Cg7g014840                          | Probable galacturonosyltransferase-like 1 [EC:2.4.1.-]                     | Probable galacturonosyltransferase-like 3                            | -1.814 |
| Cg7g019950                          | N-hydroxythioamide S-beta-glucosyltransferase [EC:2.4.1.195]               | UDP-glycosyltransferase 74B1                                         | 2.549  |
| Cg7g021600                          | Golgi-specific brefeldin A-resistance guanine nucleotide exchange factor 1 | ARF guanine-nucleotide exchange factor GNOM                          | 1.069  |
| Cg9g007480                          | Cellulose synthase A [EC:2.4.1.12]                                         | Cellulose synthase-like protein G2                                   | 1.063  |
| Cell wall modification (GO:0042545) |                                                                            |                                                                      |        |
| Cg1g015500                          | LRR receptor-like serine/threonine-protein kinase FLS2 [EC:2.7.11.1]       | LRR receptor-like serine/threonine-protein kinase FLS2               | -1.275 |
| Cg2g031930                          | F-box and leucine-rich repeat protein 2/20                                 | Putative pectinesterase/pectinesterase inhibitor 22                  | -1.492 |
| Cg1g013250                          | Pectinesterase [EC:3.1.1.11]                                               | Pectinesterase 3                                                     | -2.176 |
| Cg2g033370                          | Pectinesterase [EC:3.1.1.11]                                               | Probable pectinesterase/pectinesterase inhibitor 6                   | -1.299 |
| Cg4g018220                          | Pectinesterase [EC:3.1.1.11]                                               | Probable pectinesterase/pectinesterase inhibitor 54                  | -2.108 |
| Cg5g018160                          | Pectinesterase [EC:3.1.1.11]                                               | Probable pectinesterase/pectinesterase inhibitor 61                  | -1.288 |
| Cg2g040360                          | Pectinesterase [EC:3.1.1.11]                                               | Pectinesterase 2.2                                                   | 1.647  |

|                                                        |                                                                      |                                                              |        |
|--------------------------------------------------------|----------------------------------------------------------------------|--------------------------------------------------------------|--------|
| Cg5g030310                                             | Cytochrome P450 family 71 subfamily A                                | Cytochrome P450 83B1                                         | 3.608  |
| Cg7g019950                                             | N-hydroxythioamide S-beta-glucosyltransferase [EC:2.4.1.195]         | UDP-glycosyltransferase 74B1                                 | 2.549  |
| Cell wall macromolecule metabolic process (GO:0044036) |                                                                      |                                                              |        |
| Cg1g000850                                             | Basic endochitinase B [EC:3.2.1.14]                                  | Basic endochitinase                                          | -3.753 |
| Cg8g000790                                             | Basic endochitinase B [EC:3.2.1.14]                                  | Endochitinase                                                | -4.533 |
| Cg8g000800                                             | Basic endochitinase B [EC:3.2.1.14]                                  | Endochitinase                                                | -4.480 |
| Cg5g026680                                             | Chitinase [EC:3.2.1.14]                                              | Chitinase 4                                                  | 4.598  |
| Cg1g007100                                             | Xyloglucan:xyloglucosyl transferase [EC:2.4.1.207]                   | Probable xyloglucan endotransglucosylase/hydrolase protein 6 | -1.880 |
| Cg2g017560                                             | Xyloglucan:xyloglucosyl transferase [EC:2.4.1.207]                   | Xyloglucan endotransglucosylase/hydrolase protein 9          | -2.685 |
| Cg2g020180                                             | Omega-hydroxypalmitate O-feruloyl transferase [EC:2.3.1.188]         | Omega-hydroxypalmitate O-feruloyl transferase                | -3.290 |
| Cg7g014460                                             | Alpha-D-xyloside xylohydrolase [EC:3.2.1.177]                        | Alpha-xylosidase 1                                           | -1.159 |
| Cg5g039550                                             | Mannan endo-1,4-beta-mannosidase [EC:3.2.1.78]                       | Mannan endo-1,4-beta-mannosidase 4                           | -1.919 |
| Cg6g019480                                             | Mannose-6-phosphate isomerase [EC:5.3.1.8]                           | Mannose-6-phosphate isomerase 1                              | 1.247  |
| Cell wall pectin biosynthetic process (GO:0052325)     |                                                                      |                                                              |        |
| Cg2g020180                                             | Omega-hydroxypalmitate O-feruloyl transferase [EC:2.3.1.188]         | Omega-hydroxypalmitate O-feruloyl transferase                | -3.290 |
| Callose deposition in cell wall (GO:0052543)           |                                                                      |                                                              |        |
| Cg1g015500                                             | LRR receptor-like serine/threonine-protein kinase FLS2 [EC:2.7.11.1] | LRR receptor-like serine/threonine-protein kinase FLS2       | -1.275 |
| Cg5g030310                                             | Cytochrome P450 family 71 subfamily A                                | Cytochrome P450 83B1                                         | 3.608  |
| Cg7g019950                                             | N-hydroxythioamide S-beta-glucosyltransferase [EC:2.4.1.195]         | UDP-glycosyltransferase 74B1                                 | 2.549  |
| Cell wall thickening (GO:0052386)                      |                                                                      |                                                              |        |
| Cg1g015500                                             | LRR receptor-like serine/threonine-protein kinase FLS2 [EC:2.7.11.1] | LRR receptor-like serine/threonine-protein kinase FLS2       | -1.275 |
| Cg5g030310                                             | Cytochrome P450 family 71 subfamily A                                | Cytochrome P450 83B1                                         | 3.608  |
| Cg7g019950                                             | N-hydroxythioamide S-beta-glucosyltransferase [EC:2.4.1.195]         | UDP-glycosyltransferase 74B1                                 | 2.549  |
| Cell wall biogenesis (GO:0042546)                      |                                                                      |                                                              |        |
| Cg1g007100                                             | Xyloglucan:xyloglucosyl transferase [EC:2.4.1.207]                   | Probable xyloglucan endotransglucosylase/hydrolase protein 6 | -1.880 |
| Cg2g017560                                             | Xyloglucan:xyloglucosyl transferase [EC:2.4.1.207]                   | Xyloglucan endotransglucosylase/hydrolase protein 9          | -2.685 |
| Cg2g020180                                             | Omega-hydroxypalmitate O-feruloyl transferase [EC:2.3.1.188]         | Omega-hydroxypalmitate O-feruloyl transferase                | -3.290 |
| Cg2g040340                                             | Protein transport protein SEC61 subunit alpha                        | COBRA-like protein 10                                        | -2.721 |
| Cg6g019480                                             | Mannose-6-phosphate isomerase [EC:5.3.1.8]                           | Mannose-6-phosphate isomerase 1                              | 1.247  |
| Cg9g007480                                             | Cellulose synthase A [EC:2.4.1.12]                                   | Cellulose synthase-like protein G2                           | 1.063  |
| CgUng006010                                            | Leucine-rich PPR motif-containing protein, mitochondrial             | COBRA-like protein 1                                         | 9.115  |

|                                                              |                                                                                                                          |                                                             |        |
|--------------------------------------------------------------|--------------------------------------------------------------------------------------------------------------------------|-------------------------------------------------------------|--------|
| Cg3g023440                                                   | Integrin-linked kinase-associated serine/threonine phosphatase 2C [EC:3.1.3.16]                                          | Protein WALLS ARE THIN 1                                    | 2.919  |
| Cg2g007490                                                   | Glucuronokinase [EC:2.7.1.43]                                                                                            | Glucuronokinase 1                                           | 1.774  |
| Plant-type cell wall organization or biogenesis (GO:0071669) |                                                                                                                          |                                                             |        |
| Cg2g020180                                                   | Omega-hydroxypalmitate O-feruloyl transferase [EC:2.3.1.188]                                                             | Omega-hydroxypalmitate O-feruloyl transferase               | -3.290 |
| Cg2g040340                                                   | Protein transport protein SEC61 subunit alpha                                                                            | COBRA-like protein 10                                       | -2.721 |
| CgUng006010                                                  | Leucine-rich PPR motif-containing protein, mitochondrial                                                                 | COBRA-like protein 1                                        | 9.115  |
| Cg3g013250                                                   | Branched-chain amino acid aminotransferase [EC:2.6.1.42]                                                                 | Branched-chain-amino-acid aminotransferase 2, chloroplastic | 1.973  |
| Cg3g023440                                                   | Integrin-linked kinase-associated serine/threonine phosphatase 2C [EC:3.1.3.16]                                          | Protein WALLS ARE THIN 1                                    | 2.919  |
| Cg9g007480                                                   | Cellulose synthase A [EC:2.4.1.12]                                                                                       | Cellulose synthase-like protein G2                          | 1.063  |
| Other                                                        |                                                                                                                          |                                                             |        |
| Cg4g022640                                                   | Expansin                                                                                                                 | EG45-like domain containing protein 2                       | -4.198 |
| Cg1g015970                                                   | Interleukin-1 receptor-associated kinase 4 [EC:2.7.11.1]                                                                 | Wall-associated receptor kinase-like 10                     | 2.024  |
| Cg6g000930                                                   | Interleukin-1 receptor-associated kinase 4 [EC:2.7.11.1]   (RefSeq) putative wall-associated receptor kinase-like 16 (A) | Protein LYK5                                                | 6.121  |
| Cg5g026300                                                   | Interleukin-1 receptor-associated kinase 4 [EC:2.7.11.1]                                                                 | Wall-associated receptor kinase 5                           | -3.253 |

**Table S10.** DEGs related to stomata, chlorophyll and carotenoids metabolism, and photosynthesis in leaves of *C. grandis* seedlings exposed to Cu-toxicity

| Accession No.                                 | KEGG                                                                             | Swiss-Prot                                                                      | Log <sub>2</sub> (FC) |
|-----------------------------------------------|----------------------------------------------------------------------------------|---------------------------------------------------------------------------------|-----------------------|
| Stomatal opening (GO:1990069)                 |                                                                                  |                                                                                 |                       |
| Cg8g019250                                    | RING finger and CHY zinc finger domain-containing protein 1 [EC:2.3.2.27]        | E3 ubiquitin-protein ligase RZFP34 {ECO:0000305}                                | -2.350                |
| Cg7g004470                                    | Stomatal closure (GO:0090332)<br>Heat shock 70kDa protein 1/2/6/8                | Probable mediator of RNA polymerase II transcription subunit 37e                | 4.597                 |
| Chlorophyll biosynthetic process (GO:0015995) |                                                                                  |                                                                                 |                       |
| Cg2g021210                                    | Protochlorophyllide reductase [EC:1.3.1.33]                                      | Protochlorophyllide reductase, chloroplastic                                    | -1.721                |
| Cg5g028200                                    | Magnesium-protoporphyrin IX monomethyl ester (oxidative) cyclase [EC:1.14.13.81] | Tetrapyrrole-binding protein, chloroplastic                                     | -2.052                |
| Cg6g017060                                    |                                                                                  | Magnesium-protoporphyrin IX monomethyl ester [oxidative] cyclase, chloroplastic | -1.080                |
| Cg9g006330                                    | Mitochondrial pyruvate carrier 2                                                 | Early light-induced protein 1, chloroplastic {ECO:0000305}                      | 1.715                 |
| Chlorophyll catabolic process (GO:0015996)    |                                                                                  |                                                                                 |                       |
| Cg5g009510                                    | Magnesium dechelatase [EC:4.99.1.10]                                             | Protein STAY-GREEN 1, chloroplastic                                             | 1.601                 |
| Cg5g020710                                    | Chlorophyllase [EC:3.1.1.14]                                                     |                                                                                 | 2.019                 |
| Carotenoid biosynthetic process (GO:0016117)  |                                                                                  |                                                                                 |                       |
| Cg6g018390                                    | Geranylgeranyl diphosphate synthase, type II [EC:2.5.1.1 2.5.1.10 2.5.1.29]      | Geranylgeranyl pyrophosphate synthase, chloroplastic                            | -1.239                |
| Photosynthesis (ko00195)                      |                                                                                  |                                                                                 |                       |
| Cg9g013190                                    | F-type H <sup>+</sup> -transporting ATPase subunit b                             | Putative ATP synthase protein YMF19                                             | -1.145                |
| Cg3g024680                                    | Plastocyanin                                                                     | Plastocyanin, chloroplastic                                                     | -1.448                |
| Cg9g005290                                    | Photosystem I subunit II                                                         | Photosystem I reaction center subunit II, chloroplastic                         | -1.501                |
| Cg2g038220                                    | Photosystem I subunit III                                                        | Photosystem I reaction center subunit III, chloroplastic                        | -1.014                |
| Cg1g024920                                    | Photosystem I subunit PsaN                                                       | Photosystem I reaction center subunit N, chloroplastic                          | -1.265                |
| Cg7g005010                                    | Photosystem II oxygen-evolving enhancer protein 2                                | PsbP-like protein 1, chloroplastic                                              | -1.142                |
| Cg7g012220                                    | Photosystem II oxygen-evolving enhancer protein 2                                | Oxygen-evolving enhancer protein 2, chloroplastic                               | -1.749                |
| Cg7g017970                                    | Photosystem II PsbY protein                                                      | Photosystem II core complex proteins psbY, chloroplastic                        | -1.122                |
| Cg2g040770                                    | Photosystem II oxygen-evolving enhancer protein 3                                | Oxygen-evolving enhancer protein 3, chloroplastic                               | -2.463                |
| Cg2g014580                                    | Photosystem II Psb27 protein                                                     | Photosystem II repair protein PSB27-H1, chloroplastic                           | -1.149                |
| Cg4g017260                                    | Photosystem I subunit V                                                          | Photosystem I reaction center subunit V, chloroplastic                          | -1.799                |
| Cg8g013250                                    | Photosystem I subunit PsaO                                                       | Photosystem I subunit O                                                         | -2.645                |
| Cg8g014070                                    | Ferredoxin                                                                       | Ferredoxin-3, chloroplastic                                                     | 1.202                 |
| Photosynthesis- antenna proteins (ko00196)    |                                                                                  |                                                                                 |                       |
| Cg7g006420                                    | Light-harvesting complex I chlorophyll                                           | Chlorophyll a-b binding protein 6A,                                             | -1.626                |

|                             |                                                                  |                                                                              |        |
|-----------------------------|------------------------------------------------------------------|------------------------------------------------------------------------------|--------|
| Cg2g044430                  | a/b binding protein 1<br>Light-harvesting complex II chlorophyll | chloroplatic<br>Chlorophyll a-b binding protein 3C,                          | -1.333 |
| Cg2g044450                  | a/b binding protein 1<br>Light-harvesting complex II chlorophyll | chloroplatic<br>Chlorophyll a-b binding protein 3C,                          | -1.625 |
| Cg2g020050                  | a/b binding protein 1<br>Light-harvesting complex II chlorophyll | chloroplatic<br>Chlorophyll a-b binding protein 151,                         | -1.880 |
| Cg2g021790                  | a/b binding protein 2<br>Light-harvesting complex II chlorophyll | chloroplatic<br>Chlorophyll a-b binding protein 13,                          | -1.361 |
| Cg6g006850                  | a/b binding protein 3<br>Light-harvesting complex II chlorophyll | chloroplatic<br>Chlorophyll a-b binding protein CP29.2,                      | -1.890 |
| Cg5g023620                  | a/b binding protein 4<br>Light-harvesting complex II chlorophyll | chloroplatic<br>Chlorophyll a-b binding protein CP26,                        | -1.740 |
| Cg2g025410                  | a/b binding protein 5<br>Light-harvesting complex II chlorophyll | chloroplatic<br>Chlorophyll a-b binding protein CP24 10B,                    | -1.234 |
|                             | a/b binding protein 6                                            | chloroplatic                                                                 |        |
| Photosystem I (GO:0009522)  |                                                                  |                                                                              |        |
| Cg1g024920                  | Photosystem I subunit PsaN                                       | Photosystem I reaction center subunit N,                                     | -1.265 |
| Cg2g020050                  | Light-harvesting complex II chlorophyll                          | chloroplatic<br>Chlorophyll a-b binding protein 151,                         | -1.880 |
| Cg2g021790                  | a/b binding protein 2<br>Light-harvesting complex II chlorophyll | chloroplatic<br>Chlorophyll a-b binding protein 13,                          | -1.361 |
| Cg2g038220                  | a/b binding protein 3<br>Photosystem I subunit III               | chloroplatic<br>Photosystem I reaction center subunit III,                   | -1.014 |
| Cg2g044430                  | Photosystem I subunit V                                          | chloroplatic<br>Chlorophyll a-b binding protein 3C,                          | -1.333 |
| Cg2g044450                  | Light-harvesting complex II chlorophyll                          | chloroplatic<br>Chlorophyll a-b binding protein 3C,                          | -1.625 |
| Cg4g017260                  | a/b binding protein 1<br>Photosystem I subunit V                 | chloroplatic<br>Photosystem I reaction center subunit V,                     | -1.799 |
| Cg5g023620                  | Light-harvesting complex II chlorophyll                          | chloroplatic<br>Chlorophyll a-b binding protein CP26,                        | -1.740 |
| Cg6g006850                  | a/b binding protein 5<br>Light-harvesting complex II chlorophyll | chloroplatic<br>Chlorophyll a-b binding protein CP29.2,                      | -1.890 |
| Cg7g006420                  | a/b binding protein 4<br>Light-harvesting complex I chlorophyll  | chloroplatic<br>Chlorophyll a-b binding protein 6A,                          | -1.626 |
| Cg8g013250                  | a/b binding protein 1<br>Photosystem I subunit Psao              | chloroplatic<br>Photosystem I subunit O                                      | -2.645 |
| Cg9g005290                  | Photosystem I subunit II                                         | Photosystem I reaction center subunit II,                                    | -1.501 |
| Cg9g006330                  | Mitochondrial pyruvate carrier 2                                 | chloroplatic<br>Early light-induced protein 1, chloroplatic<br>{ECO:0000305} | 1.715  |
| Photosystem II (GO:0009523) |                                                                  |                                                                              |        |
| Cg2g020050                  | Light-harvesting complex II chlorophyll                          | Chlorophyll a-b binding protein 151,                                         | -1.880 |
| Cg2g021790                  | a/b binding protein 2<br>Light-harvesting complex II chlorophyll | chloroplatic<br>Chlorophyll a-b binding protein 13,                          | -1.361 |
| Cg2g025410                  | a/b binding protein 3<br>Light-harvesting complex II chlorophyll | chloroplatic<br>Chlorophyll a-b binding protein CP24 10B,                    | -1.234 |
|                             | a/b binding protein 6                                            | chloroplatic                                                                 |        |



|                                                      |                                                               |                                                                       |        |
|------------------------------------------------------|---------------------------------------------------------------|-----------------------------------------------------------------------|--------|
| Cg2g030130                                           |                                                               |                                                                       | -1.401 |
| Cg2g040770                                           | Photosystem II oxygen-evolving enhancer protein 3             | Oxygen-evolving enhancer protein 3, chloroplastic                     | -2.463 |
| Cg2g044430                                           | Light-harvesting complex II chlorophyll a/b binding protein 1 | Chlorophyll a-b binding protein 3C, chloroplastic                     | -1.333 |
| Cg2g044450                                           | Light-harvesting complex II chlorophyll a/b binding protein 1 | Chlorophyll a-b binding protein 3C, chloroplastic                     | -1.625 |
| Cg4g018890                                           | Mechanosensitive ion channel protein 4/5/6/7/8/9/10           |                                                                       | -1.530 |
| Cg5g023620                                           | Light-harvesting complex II chlorophyll a/b binding protein 5 | Chlorophyll a-b binding protein CP26, chloroplastic                   | -1.740 |
| Cg6g006850                                           | Light-harvesting complex II chlorophyll a/b binding protein 4 | Chlorophyll a-b binding protein CP29.2, chloroplastic                 | -1.890 |
| Cg7g005010                                           | Photosystem II oxygen-evolving enhancer protein 2             | PsbP-like protein 1, chloroplastic                                    | -1.142 |
| Cg7g006420                                           | Light-harvesting complex I chlorophyll a/b binding protein 1  | Chlorophyll a-b binding protein 6A, chloroplastic                     | -1.626 |
| Cg7g012220                                           | Photosystem II oxygen-evolving enhancer protein 2             | Oxygen-evolving enhancer protein 2, chloroplastic                     | -1.749 |
| Cg7g017970                                           | Photosystem II PsbY protein                                   | Photosystem II core complex proteins psbY, chloroplastic              | -1.122 |
| Cg9g006330                                           | Mitochondrial pyruvate carrier 2                              | Early light-induced protein 1, chloroplastic {ECO:0000305}            | 1.715  |
| Photosynthetic electron transport chain (GO:0009767) |                                                               |                                                                       |        |
| Cg4g017260                                           | Photosystem I subunit V                                       | Photosystem I reaction center subunit V, chloroplastic                | -1.799 |
| Cg5g001280                                           | 2-hydroxyacyl-CoA lyase 1 [EC:4.1.-.-]                        | NAD(P)H-quinone oxidoreductase subunit S, chloroplastic {ECO:0000305} | -1.221 |
| Cg6g024950                                           | Cell division protease FtsH [EC:3.4.24.-]                     | ATP-dependent zinc metalloprotease FTSH 6, chloroplastic              | 2.825  |
| Cg8g013250                                           | Photosystem I subunit PsbO                                    | Photosystem I subunit O                                               | -2.645 |
| Photosystem II oxygen evolving complex (GO:0009654)  |                                                               |                                                                       |        |
| Cg2g030130                                           |                                                               |                                                                       | -1.401 |
| Cg2g040770                                           | Photosystem II oxygen-evolving enhancer protein 3             | Oxygen-evolving enhancer protein 3, chloroplastic                     | -2.463 |
| Cg7g005010                                           | Photosystem II oxygen-evolving enhancer protein 2             | PsbP-like protein 1, chloroplastic                                    | -1.142 |
| Cg7g012220                                           | Photosystem II oxygen-evolving enhancer protein 2             | Oxygen-evolving enhancer protein 2, chloroplastic                     | -1.749 |
| Photosynthesis, light reaction (GO:0019684)          |                                                               |                                                                       |        |
| Cg2g014580                                           | Photosystem II Psb27 protein                                  | Photosystem II repair protein PSB27-H1, chloroplastic                 | -1.149 |
| Cg2g020050                                           | Light-harvesting complex II chlorophyll a/b binding protein 2 | Chlorophyll a-b binding protein 151, chloroplastic                    | -1.880 |
| Cg2g021790                                           | Light-harvesting complex II chlorophyll a/b binding protein 3 | Chlorophyll a-b binding protein 13, chloroplastic                     | -1.361 |
| Cg2g025410                                           | Light-harvesting complex II chlorophyll a/b binding protein 6 | Chlorophyll a-b binding protein CP24 10B, chloroplastic               | -1.234 |
| Cg2g044430                                           | Light-harvesting complex II chlorophyll                       | Chlorophyll a-b binding protein 3C, chloroplastic                     | -1.333 |

|                        |                                                                  |                                                                     |        |
|------------------------|------------------------------------------------------------------|---------------------------------------------------------------------|--------|
| Cg2g044450             | a/b binding protein 1<br>Light-harvesting complex II chlorophyll | chloroplatic<br>Chlorophyll a-b binding protein 3C,                 | -1.625 |
| Cg4g017260             | a/b binding protein 1<br>Photosystem I subunit V                 | chloroplatic<br>Photosystem I reaction center subunit V,            | -1.799 |
| Cg5g001280             | 2-hydroxyacyl-CoA lyase 1 [EC:4.1.-.-]                           | chloroplatic<br>NAD(P)H-quinone oxidoreductase subunit S,           | -1.221 |
| Cg5g023620             | Light-harvesting complex II chlorophyll                          | chloroplatic {ECO:0000305}<br>Chlorophyll a-b binding protein CP26, | -1.740 |
| Cg6g006850             | a/b binding protein 5<br>Light-harvesting complex II chlorophyll | chloroplatic<br>Chlorophyll a-b binding protein CP29.2,             | -1.890 |
| Cg7g006420             | a/b binding protein 4<br>Light-harvesting complex I chlorophyll  | chloroplatic<br>Chlorophyll a-b binding protein 6A,                 | -1.626 |
| Cg8g013250             | a/b binding protein 1<br>Photosystem I subunit PsalO             | chloroplatic<br>Photosystem I subunit O                             | -2.645 |
| Cg6g024950             | Cell division protease FtsH [EC:3.4.24.-]                        | ATP-dependent zinc metalloprotease FTSH 6,                          | 2.825  |
| Thylakoid (GO:0009579) |                                                                  |                                                                     |        |
| Cg1g024920             | Photosystem I subunit PsaN                                       | Photosystem I reaction center subunit N,                            | -1.265 |
| Cg1g027120             | Violaxanthin de-epoxidase [EC:1.23.5.1]                          | chloroplatic<br>Violaxanthin de-epoxidase, chloroplatic             | 1.227  |
| Cg2g001710             | Enoyl-[acyl-carrier protein] reductase I                         | Enoyl-[acyl-carrier-protein] reductase                              | 1.679  |
| Cg2g014580             | [EC:1.3.1.9 1.3.1.10]<br>Photosystem II Psb27 protein            | [NADH], chloroplatic<br>Photosystem II repair protein PSB27-H1,     | -1.149 |
| Cg2g020050             | Light-harvesting complex II chlorophyll                          | chloroplatic<br>Chlorophyll a-b binding protein 151,                | -1.880 |
| Cg2g021790             | a/b binding protein 2<br>Light-harvesting complex II chlorophyll | chloroplatic<br>Chlorophyll a-b binding protein 13,                 | -1.361 |
| Cg2g025410             | a/b binding protein 3<br>Light-harvesting complex II chlorophyll | chloroplatic<br>Chlorophyll a-b binding protein CP24 10B,           | -1.234 |
| Cg2g030130             | a/b binding protein 6                                            | chloroplatic                                                        | -1.401 |
| Cg2g038220             | Photosystem I subunit III                                        | Photosystem I reaction center subunit III,                          | -1.014 |
| Cg2g040770             | Photosystem II oxygen-evolving                                   | chloroplatic<br>Oxygen-evolving enhancer protein 3,                 | -2.463 |
| Cg2g044230             | enhancer protein 3<br>Translation initiation factor 3 subunit D  | chloroplatic<br>Cold-regulated 413 inner membrane protein 1,        | 1.369  |
| Cg2g044430             | Light-harvesting complex II chlorophyll                          | chloroplatic<br>Chlorophyll a-b binding protein 3C,                 | -1.333 |
| Cg2g044450             | a/b binding protein 1<br>Light-harvesting complex II chlorophyll | chloroplatic<br>Chlorophyll a-b binding protein 3C,                 | -1.625 |
| Cg2g044950             | a/b binding protein 1<br>9-cis-epoxycarotenoid dioxygenase       | chloroplatic<br>9-cis-epoxycarotenoid dioxygenase NCED1,            | -3.481 |
| Cg3g024680             | [EC:1.13.11.51]<br>Plastocyanin                                  | chloroplatic<br>Plastocyanin, chloroplatic                          | -1.448 |
| Cg4g006740             | Solute carrier family 39 (zinc                                   | Zinc transporter 4, chloroplatic                                    | -1.718 |
| Cg4g017260             | transporter), member 1/2/3<br>Photosystem I subunit V            | Photosystem I reaction center subunit V,                            | -1.799 |
|                        |                                                                  | chloroplatic                                                        |        |



|                                                       |                                                                                                                |                                                                                                                  |        |
|-------------------------------------------------------|----------------------------------------------------------------------------------------------------------------|------------------------------------------------------------------------------------------------------------------|--------|
| Cg4g018890                                            | Mechanosensitive ion channel protein<br>4/5/6/7/8/9/10                                                         |                                                                                                                  | -1.530 |
| Cg5g001280                                            | 2-hydroxyacyl-CoA lyase 1 [EC:4.1.-.-]                                                                         | NAD(P)H-quinone oxidoreductase subunit S,<br>chloroplastic {ECO:0000305}                                         | -1.221 |
| Cg5g009510                                            | Magnesium dechelataase [EC:4.99.1.10]                                                                          | Protein STAY-GREEN 1, chloroplastic                                                                              | 1.601  |
| Cg5g018720                                            | Arsenate reductase [EC:1.20.4.1]                                                                               | Rhodanese-like domain-containing protein 14,<br>chloroplastic                                                    | -1.171 |
| Cg5g023620                                            | Light-harvesting complex II chlorophyll<br>a/b binding protein 5                                               | Chlorophyll a-b binding protein CP26,<br>chloroplastic                                                           | -1.740 |
| Cg5g031990                                            | 2-methylene-furan-3-one reductase<br>[EC:1.3.1.105]                                                            | Chloroplast envelope quinone oxidoreductase<br>homolog {ECO:0000303 PubMed:20424175}                             | 1.736  |
| Cg5g038890                                            |                                                                                                                | Nitrogen regulatory protein P-II homolog                                                                         | 1.759  |
| Cg6g006850                                            | Light-harvesting complex II chlorophyll<br>a/b binding protein 4                                               | Chlorophyll a-b binding protein CP29.2,<br>chloroplastic                                                         | -1.890 |
| Cg6g024950                                            | Cell division protease FtsH [EC:3.4.24.-]                                                                      | ATP-dependent zinc metalloprotease FTSH 6,<br>chloroplastic                                                      | 2.825  |
| Cg7g005010                                            | Photosystem II oxygen-evolving<br>enhancer protein 2                                                           | PsbP-like protein 1, chloroplastic                                                                               | -1.142 |
| Cg7g006420                                            | Light-harvesting complex I chlorophyll<br>a/b binding protein 1                                                | Chlorophyll a-b binding protein 6A,<br>chloroplastic                                                             | -1.626 |
| Cg7g012220                                            | Photosystem II oxygen-evolving<br>enhancer protein 2                                                           | Oxygen-evolving enhancer protein 2,<br>chloroplastic                                                             | -1.749 |
| Cg7g012360                                            | Glutathione S-transferase [EC:2.5.1.18]                                                                        | Glutathione S-transferase F9                                                                                     | -1.318 |
| Cg7g014530                                            | Pyruvate dehydrogenase E2 component<br>(dihydrolipoamide acetyltransferase)<br>[EC:2.3.1.12]                   | Dihydrolipoyllysine-residue acetyltransferase<br>component 4 of pyruvate dehydrogenase<br>complex, chloroplastic | 1.067  |
| Cg7g017970                                            | Photosystem II PsbY protein                                                                                    | Photosystem II core complex proteins psbY,<br>chloroplastic                                                      | -1.122 |
| Cg8g000920                                            | Signal recognition particle 43 kDa<br>protein                                                                  | Signal recognition particle 43 kDa protein,<br>chloroplastic                                                     | -1.144 |
| Cg8g013250                                            | Photosystem I subunit PsbO                                                                                     | Photosystem I subunit O                                                                                          | -2.645 |
| Cg9g005290                                            | Photosystem I subunit II                                                                                       | Photosystem I reaction center subunit II,<br>chloroplastic                                                       | -1.501 |
| Cg9g006330                                            | Mitochondrial pyruvate carrier 2                                                                               | Early light-induced protein 1, chloroplastic<br>{ECO:0000305}                                                    | 1.715  |
| Cg9g006690                                            |                                                                                                                | Photosynthetic NDH subunit of subcomplex B<br>5, chloroplastic<br>{ECO:0000303 PubMed:21785130}                  | -1.012 |
| CgUng00263<br>0                                       | ATPase family AAA domain-containing<br>protein 2 [EC:3.6.1.-]<br>Photosynthesis, dark reaction<br>(GO:0019685) | Thylakoid lumenal 15.0 kDa protein 2,<br>chloroplastic                                                           | -1.004 |
| Cg4g021720                                            | Ribulose-bisphosphate carboxylase small<br>chain [EC:4.1.1.39]                                                 | Ribulose bisphosphate carboxylase small<br>chain, chloroplastic                                                  | 1.954  |
| Cg7g006810                                            | Transketolase [EC:2.2.1.1]                                                                                     | Transketolase-1, chloroplastic                                                                                   | 4.959  |
| Carbon fixation in photosynthetic organisms (ko00710) |                                                                                                                |                                                                                                                  |        |
| Cg5g000690                                            | Malate dehydrogenase [EC:1.1.1.37]                                                                             | Oligopeptide transporter 7                                                                                       | 2.225  |
| Cg9g002710                                            | Malate dehydrogenase (decarboxylating)<br>[EC:1.1.1.39]                                                        | F-box protein At2g17036                                                                                          | 2.633  |
| Cg7g006810                                            | Transketolase [EC:2.2.1.1]                                                                                     | Transketolase-1, chloroplastic                                                                                   | 4.959  |

|            |                                                                |                                                                 |       |
|------------|----------------------------------------------------------------|-----------------------------------------------------------------|-------|
| Cg2g008710 | Phosphoenolpyruvate carboxylase<br>[EC:4.1.1.31]               | Phosphoenolpyruvate carboxylase 2                               | 1.414 |
| Cg4g021720 | Ribulose-bisphosphate carboxylase small<br>chain [EC:4.1.1.39] | Ribulose bisphosphate carboxylase small chain,<br>chloroplastic | 1.954 |
| Cg3g013480 | Phosphoenolpyruvate carboxykinase<br>(ATP) [EC:4.1.1.49]       | Phosphoenolpyruvate carboxykinase (ATP)                         | 3.955 |

**Table S11.** DEGs involved in carbon, carbohydrate and energy metabolisms in leaves of *C. grandis* seedlings exposed to Cu-toxicity

| Accession No.               | KEGG                                                                                   | Swiss-Prot                                                                                                 | Log <sub>2</sub> (FC) |
|-----------------------------|----------------------------------------------------------------------------------------|------------------------------------------------------------------------------------------------------------|-----------------------|
| Carbon metabolism (ko01200) |                                                                                        |                                                                                                            |                       |
| Cg5g000690                  | Malate dehydrogenase [EC:1.1.1.37]                                                     | Oligopeptide transporter 7                                                                                 | 2.225                 |
| Cg9g002710                  | Malate dehydrogenase (decarboxylating) [EC:1.1.1.39]                                   | F-box protein At2g17036                                                                                    | 2.633                 |
| Cg5g000260                  | Pyruvate dehydrogenase E1 component alpha subunit [EC:1.2.4.1]                         | Pyruvate dehydrogenase E1 component subunit alpha-3, chloroplastic                                         | 2.284                 |
| Cg5g040000                  | Pyruvate dehydrogenase E1 component alpha subunit [EC:1.2.4.1]                         | Pyruvate dehydrogenase E1 component subunit alpha-3, chloroplastic                                         | 1.723                 |
| Cg2g044960                  | Pyruvate dehydrogenase E1 component beta subunit [EC:1.2.4.1]                          | Pyruvate dehydrogenase E1 component subunit beta-3, chloroplastic                                          | 1.708                 |
| Cg3g020270                  | Pyruvate dehydrogenase E2 component (dihydrolipoamide acetyltransferase) [EC:2.3.1.12] | Dihydrolipoyllysine-residue acetyltransferase component 5 of pyruvate dehydrogenase complex, chloroplastic | 1.308                 |
| Cg7g014530                  | Pyruvate dehydrogenase E2 component (dihydrolipoamide acetyltransferase) [EC:2.3.1.12] | Dihydrolipoyllysine-residue acetyltransferase component 4 of pyruvate dehydrogenase complex, chloroplastic | 1.067                 |
| Cg8g002550                  | Pyruvate kinase [EC:2.7.1.40]                                                          | Pyruvate kinase isozyme A, chloroplastic                                                                   | 1.707                 |
| Cg9g006500                  | Pyruvate kinase [EC:2.7.1.40]                                                          | Pyruvate kinase isozyme A, chloroplastic                                                                   | 1.238                 |
| Cg9g028010                  | Pyruvate kinase [EC:2.7.1.40]                                                          | Plastidial pyruvate kinase 2                                                                               | 1.374                 |
| Cg2g008710                  | Phosphoenolpyruvate carboxylase [EC:4.1.1.31]                                          | Phosphoenolpyruvate carboxylase 2                                                                          | 1.414                 |
| Cg3g013480                  | Phosphoenolpyruvate carboxykinase (ATP) [EC:4.1.1.49]                                  | Phosphoenolpyruvate carboxykinase (ATP)                                                                    | 3.955                 |
| Cg3g015300                  | 2,3-bisphosphoglycerate-dependent phosphoglycerate mutase [EC:5.4.2.11]                | Metal-independent phosphoserine phosphatase                                                                | 1.759                 |
| Cg4g020570                  | Acetyl-CoA carboxylase, biotin carboxylase subunit [EC:6.4.1.2 6.3.4.14]               | Biotin carboxylase 2, chloroplastic                                                                        | 2.541                 |
| Cg5g042320                  | Acetyl-CoA carboxylase carboxyl transferase subunit alpha [EC:6.4.1.2 2.1.3.15]        |                                                                                                            | 1.817                 |
| Cg6g025700                  | Acetyl-CoA carboxylase biotin carboxyl carrier protein                                 | Biotin carboxyl carrier protein of acetyl-CoA carboxylase 1, chloroplastic                                 | 1.829                 |
| Cg9g001500                  | Dihydrolipoamide dehydrogenase [EC:1.8.1.4]                                            | Dihydrolipoyl dehydrogenase 1, chloroplastic                                                               | 1.144                 |
| Cg7g006810                  | Transketolase [EC:2.2.1.1]                                                             | Transketolase-1, chloroplastic                                                                             | 4.959                 |
| Cg2g020490                  | Acetyl-CoA C-acetyltransferase [EC:2.3.1.9]                                            | Acetyl-CoA acetyltransferase, cytosolic 1                                                                  | 1.243                 |
| Cg5g009780                  | (S)-2-hydroxy-acid oxidase [EC:1.1.3.15]                                               | Probable transcriptional regulator SLK2                                                                    | 2.193                 |
| Cg5g007370                  | Glutamate dehydrogenase (NAD(P) <sup>+</sup> ) [EC:1.4.1.3]                            | Glutamate dehydrogenase 2                                                                                  | 1.745                 |
| Cg4g021720                  | Ribulose-bisphosphate carboxylase small chain [EC:4.1.1.39]                            | Ribulose bisphosphate carboxylase small chain, chloroplastic                                               | 1.954                 |
| Cg4g004610                  | 6-phosphofructokinase 1 [EC:2.7.1.11]                                                  | ATP-dependent 6-phosphofructokinase 3                                                                      | 1.958                 |
| Cg1g013660                  | 6-phosphofructokinase 1 [EC:2.7.1.11]                                                  | ATP-dependent 6-phosphofructokinase 3                                                                      | 1.420                 |
| Cg7g022330                  | 6-phosphofructokinase 1 [EC:2.7.1.11]                                                  | Acyl carrier protein 1, chloroplastic                                                                      | -1.663                |
| Cg7g016170                  | 6-phosphogluconolactonase [EC:3.1.1.31]                                                | Probable 6-phosphogluconolactonase 1                                                                       | -1.087                |
| Cg9g001560                  | Acetate/butyrate---CoA ligase [EC:6.2.1.1]                                             | Acetate/butyrate--CoA ligase AAE7,                                                                         | -1.161                |

|                                         |                                                                                                             |                                                                       |        |
|-----------------------------------------|-------------------------------------------------------------------------------------------------------------|-----------------------------------------------------------------------|--------|
| Cg6g007590                              | 6.2.1.2]<br>S-(hydroxymethyl)glutathione<br>dehydrogenase / alcohol dehydrogenase<br>[EC:1.1.1.284 1.1.1.1] | peroxisomal<br>Alcohol dehydrogenase-like 2                           | -2.347 |
| Cg5g008070                              | 3-hydroxyisobutyryl-CoA hydrolase<br>[EC:3.1.2.4]                                                           | 3-hydroxyisobutyryl-CoA hydrolase-like<br>protein 2, mitochondrial    | -1.318 |
| Cg3g025260                              | Catalase [EC:1.11.1.6]                                                                                      | Catalase                                                              | -1.191 |
| Starch and sucrose metabolism (ko00500) |                                                                                                             |                                                                       |        |
| Cg4g018060                              | Sucrose synthase [EC:2.4.1.13]                                                                              | Sucrose synthase                                                      | 1.848  |
| Cg9g002460                              | Sucrose synthase [EC:2.4.1.13]                                                                              | Sucrose synthase 2                                                    | 3.483  |
| Cg4g002030                              | Sucrose-phosphate synthase [EC:2.4.1.14]                                                                    | Probable sucrose-phosphate synthase 1                                 | 1.365  |
| Cg3g025200                              | 1,4-alpha-glucan branching enzyme<br>[EC:2.4.1.18]                                                          | 1,4-alpha-glucan-branching enzyme 1,<br>chloroplastic/amyloplastic    | 1.472  |
| Cg6g016110                              | 1,4-alpha-glucan branching enzyme<br>[EC:2.4.1.18]                                                          | 1,4-alpha-glucan-branching enzyme 1,<br>chloroplastic/amyloplastic    | 1.133  |
| Cg4g020710                              | Isoamylase [EC:3.2.1.68]                                                                                    | Isoamylase 1, chloroplastic                                           | 1.749  |
| Cg5g008610                              | Trehalose 6-phosphate phosphatase<br>[EC:3.1.3.12]                                                          | Probable trehalose-phosphate phosphatase G                            | 1.209  |
| Cg2g006510                              | Trehalose 6-phosphate phosphatase<br>[EC:3.1.3.12]                                                          | Protein KINESIN LIGHT CHAIN-RELATED<br>2                              | -1.191 |
| Cg4g022560                              | Trehalose 6-phosphate<br>synthase/phosphatase [EC:2.4.1.15 3.1.3.12]                                        | Probable alpha,alpha-trehalose-phosphate<br>synthase [UDP-forming] 11 | 1.050  |
| Cg5g004730                              | Trehalose 6-phosphate<br>synthase/phosphatase [EC:2.4.1.15 3.1.3.12]                                        | Probable alpha,alpha-trehalose-phosphate<br>synthase [UDP-forming] 9  | -2.681 |
| Cg3g024770                              | Alpha-amylase [EC:3.2.1.1]                                                                                  | Probable alpha-amylase 2                                              | 1.243  |
| Cg3g021390                              | Alpha-amylase [EC:3.2.1.1]                                                                                  | Alpha-amylase                                                         | -2.293 |
| Cg2g017760                              | Beta-amylase [EC:3.2.1.2]                                                                                   | Beta-amylase                                                          | -1.926 |
| Cg5g008630                              | Beta-fructofuranosidase [EC:3.2.1.26]                                                                       | Acid beta-fructofuranosidase                                          | 3.237  |
| Cg5g037320                              | Beta-glucosidase [EC:3.2.1.21]                                                                              | Beta-glucosidase 11                                                   | 1.166  |
| Cg6g000800                              | Beta-glucosidase [EC:3.2.1.21]                                                                              | Subtilisin-like protease SBT1.9                                       | 2.274  |
| Cg8g014060                              | Glucan endo-1,3-beta-glucosidase 1/2/3<br>[EC:3.2.1.39]                                                     | Glucan endo-1,3-beta-glucosidase 14                                   | 1.055  |
| Cg8g022430                              | Glucan endo-1,3-beta-glucosidase 1/2/3<br>[EC:3.2.1.39]                                                     | Glucan endo-1,3-beta-glucosidase                                      | 1.465  |
| Cg9g018300                              | Glucan endo-1,3-beta-glucosidase 1/2/3<br>[EC:3.2.1.39]                                                     | Glucan endo-1,3-beta-glucosidase, basic<br>isoform                    | -2.343 |
| Cg3g023860                              | Endoglucanase [EC:3.2.1.4]                                                                                  | Endoglucanase 10                                                      | 1.121  |
| Glycolysis / gluconeogenesis (ko00010)  |                                                                                                             |                                                                       |        |
| Cg6g005300                              | Alcohol dehydrogenase (NADP <sup>+</sup> )<br>[EC:1.1.1.2]                                                  | NADPH-dependent aldo-keto reductase,<br>chloroplastic                 | 1.372  |
| Cg7g019540                              | Aldehyde dehydrogenase (NAD <sup>+</sup> )<br>[EC:1.2.1.3]                                                  | Aldehyde dehydrogenase family 2 member<br>B7, mitochondrial           | -1.801 |
| Cg5g032800                              | Alcohol dehydrogenase class-P [EC:1.1.1.1]                                                                  | Alcohol dehydrogenase                                                 | -1.629 |
| Cg5g000260                              | Pyruvate dehydrogenase E1 component<br>alpha subunit [EC:1.2.4.1]                                           | Pyruvate dehydrogenase E1 component<br>subunit alpha-3, chloroplastic | 2.284  |
| Cg5g040000                              | Pyruvate dehydrogenase E1 component<br>alpha subunit [EC:1.2.4.1]                                           | Pyruvate dehydrogenase E1 component<br>subunit alpha-3, chloroplastic | 1.723  |
| Cg2g044960                              | Pyruvate dehydrogenase E1 component                                                                         | Pyruvate dehydrogenase E1 component                                   | 1.708  |

|                                 |                                                                                                                           |                                                                                                                                                   |        |
|---------------------------------|---------------------------------------------------------------------------------------------------------------------------|---------------------------------------------------------------------------------------------------------------------------------------------------|--------|
| Cg3g020270                      | beta subunit [EC:1.2.4.1]<br>Pyruvate dehydrogenase E2 component<br>(dihydrolipoamide acetyltransferase)<br>[EC:2.3.1.12] | subunit beta-3, chloroplastic<br>Dihydrolipoyllysine-residue acetyltransferase<br>component 5 of pyruvate dehydrogenase<br>complex, chloroplastic | 1.308  |
| Cg7g014530                      | Pyruvate dehydrogenase E2 component<br>(dihydrolipoamide acetyltransferase)<br>[EC:2.3.1.12]                              | Dihydrolipoyllysine-residue acetyltransferase<br>component 4 of pyruvate dehydrogenase<br>complex, chloroplastic                                  | 1.067  |
| Cg8g002550                      | Pyruvate kinase [EC:2.7.1.40]                                                                                             | Pyruvate kinase isozyme A, chloroplastic                                                                                                          | 1.707  |
| Cg9g006500                      | Pyruvate kinase [EC:2.7.1.40]                                                                                             | Pyruvate kinase isozyme A, chloroplastic                                                                                                          | 1.238  |
| Cg9g028010                      | Pyruvate kinase [EC:2.7.1.40]                                                                                             | Plastidial pyruvate kinase 2                                                                                                                      | 1.374  |
| Cg6g009400                      | Pyruvate decarboxylase [EC:4.1.1.1]                                                                                       | Pyruvate decarboxylase 1                                                                                                                          | 1.236  |
| Cg3g013480                      | Phosphoenolpyruvate carboxykinase<br>(ATP) [EC:4.1.1.49]                                                                  | Phosphoenolpyruvate carboxykinase (ATP)                                                                                                           | 3.955  |
| Cg9g001500                      | Dihydrolipoamide dehydrogenase<br>[EC:1.8.1.4]                                                                            | Dihydrolipoyl dehydrogenase 1,<br>chloroplastic                                                                                                   | 1.144  |
| Cg5g041140                      | Glucose-6-phosphate 1-epimerase<br>[EC:5.1.3.15]                                                                          | Putative glucose-6-phosphate 1-epimerase                                                                                                          | 1.298  |
| Cg3g015300                      | 2,3-bisphosphoglycerate-dependent<br>phosphoglycerate mutase [EC:5.4.2.11]                                                | Metal-independent phosphoserine<br>phosphatase                                                                                                    | 1.759  |
| Cg4g004610                      | 6-phosphofructokinase 1 [EC:2.7.1.11]                                                                                     | ATP-dependent 6-phosphofructokinase 3                                                                                                             | 1.958  |
| Cg1g013660                      | 6-phosphofructokinase 1 [EC:2.7.1.11]                                                                                     | ATP-dependent 6-phosphofructokinase 3                                                                                                             | 1.420  |
| Cg7g022330                      | 6-phosphofructokinase 1 [EC:2.7.1.11]                                                                                     | Acyl carrier protein 1, chloroplastic                                                                                                             | -1.663 |
| Cg6g018080                      | Aldose 1-epimerase [EC:5.1.3.3]                                                                                           |                                                                                                                                                   | -3.506 |
| Cg9g001560                      | Acetate/butyrate---CoA ligase [EC:6.2.1.1<br>6.2.1.2]                                                                     | Acetate/butyrate--CoA ligase AAE7,<br>peroxisomal                                                                                                 | -1.161 |
| Cg6g007590                      | S-(hydroxymethyl)glutathione<br>dehydrogenase / alcohol dehydrogenase<br>[EC:1.1.1.284 1.1.1.1]                           | Alcohol dehydrogenase-like 2                                                                                                                      | -2.347 |
| Glycolytic process (GO:0006096) |                                                                                                                           |                                                                                                                                                   |        |
| Cg2g044960                      | Pyruvate dehydrogenase E1 component<br>beta subunit [EC:1.2.4.1]                                                          | Pyruvate dehydrogenase E1 component<br>subunit beta-3, chloroplastic                                                                              | 1.708  |
| Cg3g005210                      |                                                                                                                           | Ethylene-responsive transcription factor<br>WRI1                                                                                                  | 2.575  |
| Cg3g020270                      | Pyruvate dehydrogenase E2 component<br>(dihydrolipoamide acetyltransferase)<br>[EC:2.3.1.12]                              | Dihydrolipoyllysine-residue acetyltransferase<br>component 5 of pyruvate dehydrogenase<br>complex, chloroplastic                                  | 1.308  |
| Cg5g000260                      | Pyruvate dehydrogenase E1 component<br>alpha subunit [EC:1.2.4.1]                                                         | Pyruvate dehydrogenase E1 component<br>subunit alpha-3, chloroplastic                                                                             | 2.284  |
| Cg5g040000                      | Pyruvate dehydrogenase E1 component<br>alpha subunit [EC:1.2.4.1]                                                         | Pyruvate dehydrogenase E1 component<br>subunit alpha-3, chloroplastic                                                                             | 1.723  |
| Cg7g014530                      | Pyruvate dehydrogenase E2 component<br>(dihydrolipoamide acetyltransferase)<br>[EC:2.3.1.12]                              | Dihydrolipoyllysine-residue acetyltransferase<br>component 4 of pyruvate dehydrogenase<br>complex, chloroplastic                                  | 1.067  |
| Cg1g013660                      | 6-phosphofructokinase 1 [EC:2.7.1.11]                                                                                     | ATP-dependent 6-phosphofructokinase 3                                                                                                             | 1.420  |
| Cg4g004610                      | 6-phosphofructokinase 1 [EC:2.7.1.11]                                                                                     | ATP-dependent 6-phosphofructokinase 3                                                                                                             | 1.958  |
| Pyruvate metabolism (ko00620)   |                                                                                                                           |                                                                                                                                                   |        |
| Cg5g000690                      | Malate dehydrogenase [EC:1.1.1.37]                                                                                        | Oligopeptide transporter 7                                                                                                                        | 2.225  |
| Cg9g002710                      | Malate dehydrogenase (decarboxylating)<br>[EC:1.1.1.39]                                                                   | F-box protein At2g17036                                                                                                                           | 2.633  |
| Cg5g000260                      | Pyruvate dehydrogenase E1 component                                                                                       | Pyruvate dehydrogenase E1 component                                                                                                               | 2.284  |

|                                     |                                                                                                  |                                                                                                                  |        |
|-------------------------------------|--------------------------------------------------------------------------------------------------|------------------------------------------------------------------------------------------------------------------|--------|
| Cg5g040000                          | alpha subunit [EC:1.2.4.1]<br>Pyruvate dehydrogenase E1 component                                | subunit alpha-3, chloroplastic<br>Pyruvate dehydrogenase E1 component                                            | 1.723  |
| Cg2g044960                          | alpha subunit [EC:1.2.4.1]<br>Pyruvate dehydrogenase E1 component                                | subunit alpha-3, chloroplastic<br>Pyruvate dehydrogenase E1 component                                            | 1.708  |
| Cg3g020270                          | beta subunit [EC:1.2.4.1]<br>Pyruvate dehydrogenase E2 component                                 | subunit beta-3, chloroplastic<br>Dihydrolipoyllysine-residue acetyltransferase                                   | 1.308  |
| Cg7g014530                          | (dihydrolipoamide acetyltransferase)<br>[EC:2.3.1.12]<br>Pyruvate dehydrogenase E2 component     | component 5 of pyruvate dehydrogenase<br>complex, chloroplastic<br>Dihydrolipoyllysine-residue acetyltransferase | 1.067  |
| Cg8g002550                          | (dihydrolipoamide acetyltransferase)<br>[EC:2.3.1.12]<br>Pyruvate kinase [EC:2.7.1.40]; Pyruvate | component 4 of pyruvate dehydrogenase<br>complex, chloroplastic<br>kinase isozyme A, chloroplastic               | 1.707  |
| Cg9g006500                          | kinase isozyme A, chloroplastic<br>Pyruvate kinase [EC:2.7.1.40]                                 | Pyruvate kinase isozyme A, chloroplastic                                                                         | 1.238  |
| Cg9g028010                          | Pyruvate kinase [EC:2.7.1.40]                                                                    | Plastidial pyruvate kinase 2                                                                                     | 1.374  |
| Cg2g008710                          | Phosphoenolpyruvate carboxylase<br>[EC:4.1.1.31]                                                 | Phosphoenolpyruvate carboxylase 2                                                                                | 1.414  |
| Cg3g013480                          | Phosphoenolpyruvate carboxykinase<br>(ATP) [EC:4.1.1.49]                                         | Phosphoenolpyruvate carboxykinase (ATP)                                                                          | 3.955  |
| Cg9g001500                          | Dihydrolipoamide dehydrogenase<br>[EC:1.8.1.4]                                                   | Dihydrolipoyl dehydrogenase 1,<br>chloroplastic                                                                  | 1.144  |
| Cg2g020490                          | Acetyl-CoA C-acetyltransferase [EC:2.3.1.9]                                                      | Acetyl-CoA acetyltransferase, cytosolic 1                                                                        | 1.243  |
| Cg4g020570                          | Acetyl-CoA carboxylase, biotin carboxylase<br>subunit [EC:6.4.1.2 6.3.4.14]                      | Biotin carboxylase 2, chloroplastic                                                                              | 2.541  |
| Cg5g042320                          | Acetyl-CoA carboxylase carboxyl<br>transferase subunit alpha [EC:6.4.1.2<br>2.1.3.15]            |                                                                                                                  | 1.817  |
| Cg6g025700                          | Acetyl-CoA carboxylase biotin carboxyl<br>carrier protein                                        | Biotin carboxyl carrier protein of acetyl-CoA<br>carboxylase 1, chloroplastic                                    | 1.829  |
| Cg9g001560                          | Acetate/butyrate---CoA ligase [EC:6.2.1.1<br>6.2.1.2]                                            | Acetate/butyrate--CoA ligase AAE7,<br>peroxisomal                                                                | -1.161 |
| Cg7g019540                          | Aldehyde dehydrogenase (NAD <sup>+</sup> )<br>[EC:1.2.1.3]                                       | Aldehyde dehydrogenase family 2 member<br>B7, mitochondrial                                                      | -1.801 |
| Citrate cycle (TCA cycle) (ko00020) |                                                                                                  |                                                                                                                  |        |
| Cg5g000690                          | Malate dehydrogenase [EC:1.1.1.37]                                                               | Oligopeptide transporter 7                                                                                       | 2.225  |
| Cg5g000260                          | Pyruvate dehydrogenase E1 component<br>alpha subunit [EC:1.2.4.1]                                | Pyruvate dehydrogenase E1 component<br>subunit alpha-3, chloroplastic                                            | 2.284  |
| Cg5g040000                          | Pyruvate dehydrogenase E1 component<br>alpha subunit [EC:1.2.4.1]                                | Pyruvate dehydrogenase E1 component<br>subunit alpha-3, chloroplastic                                            | 1.723  |
| Cg2g044960                          | Pyruvate dehydrogenase E1 component<br>beta subunit [EC:1.2.4.1]                                 | Pyruvate dehydrogenase E1 component<br>subunit beta-3, chloroplastic                                             | 1.708  |
| Cg9g001500                          | Dihydrolipoamide dehydrogenase<br>[EC:1.8.1.4]                                                   | Dihydrolipoyl dehydrogenase 1,<br>chloroplastic                                                                  | 1.144  |
| Cg3g020270                          | Pyruvate dehydrogenase E2 component<br>(dihydrolipoamide acetyltransferase)<br>[EC:2.3.1.12]     | Dihydrolipoyllysine-residue acetyltransferase<br>component 5 of pyruvate dehydrogenase<br>complex, chloroplastic | 1.308  |
| Cg7g014530                          | Pyruvate dehydrogenase E2 component<br>(dihydrolipoamide acetyltransferase)                      | Dihydrolipoyllysine-residue acetyltransferase<br>component 4 of pyruvate dehydrogenase                           | 1.067  |



|                                       |                                                                                          |                                                                                                            |        |
|---------------------------------------|------------------------------------------------------------------------------------------|------------------------------------------------------------------------------------------------------------|--------|
| Cg3g013480                            | [EC:2.3.1.12]<br>Phosphoenolpyruvate carboxykinase (ATP) [EC:4.1.1.49]                   | complex, chloroplastic<br>Phosphoenolpyruvate carboxykinase (ATP)                                          | 3.955  |
| ATP biosynthetic process (GO:0006754) |                                                                                          |                                                                                                            |        |
| Cg1g013660                            | 6-phosphofructokinase 1 [EC:2.7.1.11]                                                    | ATP-dependent 6-phosphofructokinase 3                                                                      | 1.420  |
| Cg2g044960                            | Pyruvate dehydrogenase E1 component beta subunit [EC:1.2.4.1]                            | Pyruvate dehydrogenase E1 component subunit beta-3, chloroplastic                                          | 1.708  |
| Cg3g020270                            | Pyruvate dehydrogenase E2 component (dihydrolipoamide acetyltransferase) [EC:2.3.1.12]   | Dihydrolipoyllysine-residue acetyltransferase component 5 of pyruvate dehydrogenase complex, chloroplastic | 1.308  |
| Cg4g004610                            | 6-phosphofructokinase 1 [EC:2.7.1.11]                                                    | ATP-dependent 6-phosphofructokinase 3                                                                      | 1.958  |
| Cg5g000260                            | Pyruvate dehydrogenase E1 component alpha subunit [EC:1.2.4.1]                           | Pyruvate dehydrogenase E1 component subunit alpha-3, chloroplastic                                         | 2.284  |
| Cg5g040000                            | Pyruvate dehydrogenase E1 component alpha subunit [EC:1.2.4.1]                           | Pyruvate dehydrogenase E1 component subunit alpha-3, chloroplastic                                         | 1.723  |
| Cg7g014530                            | Pyruvate dehydrogenase E2 component (dihydrolipoamide acetyltransferase) [EC:2.3.1.12]   | Dihydrolipoyllysine-residue acetyltransferase component 4 of pyruvate dehydrogenase complex, chloroplastic | 1.067  |
| Cg3g005210                            |                                                                                          | Ethylene-responsive transcription factor WRI1                                                              | 2.575  |
| Cg9g013190                            | F-type H <sup>+</sup> -transporting ATPase subunit b                                     | Putative ATP synthase protein YMF19                                                                        | -1.145 |
| Cg1g013420                            | H <sup>+</sup> -transporting ATPase [EC:3.6.3.6]<br>ATP generation from ADP (GO:0006757) | ATPase 10, plasma membrane-type                                                                            | -3.022 |
| Cg1g013660                            | 6-phosphofructokinase 1 [EC:2.7.1.11]                                                    | ATP-dependent 6-phosphofructokinase 3                                                                      | 1.420  |
| Cg2g044960                            | Pyruvate dehydrogenase E1 component beta subunit [EC:1.2.4.1]                            | Pyruvate dehydrogenase E1 component subunit beta-3, chloroplastic                                          | 1.708  |
| Cg3g020270                            | Pyruvate dehydrogenase E2 component (dihydrolipoamide acetyltransferase) [EC:2.3.1.12]   | Dihydrolipoyllysine-residue acetyltransferase component 5 of pyruvate dehydrogenase complex, chloroplastic | 1.308  |
| Cg4g004610                            | 6-phosphofructokinase 1 [EC:2.7.1.11]                                                    | ATP-dependent 6-phosphofructokinase 3                                                                      | 1.958  |
| Cg5g000260                            | Pyruvate dehydrogenase E1 component alpha subunit [EC:1.2.4.1]                           | Pyruvate dehydrogenase E1 component subunit alpha-3, chloroplastic                                         | 2.284  |
| Cg5g040000                            | Pyruvate dehydrogenase E1 component alpha subunit [EC:1.2.4.1]                           | Pyruvate dehydrogenase E1 component subunit alpha-3, chloroplastic                                         | 1.723  |
| Cg7g014530                            | Pyruvate dehydrogenase E2 component (dihydrolipoamide acetyltransferase) [EC:2.3.1.12]   | Dihydrolipoyllysine-residue acetyltransferase component 4 of pyruvate dehydrogenase complex, chloroplastic | 1.067  |
| Cg3g005210                            |                                                                                          | Ethylene-responsive transcription factor WRI1                                                              | 2.575  |

**Table S12.** DEGs involved in photorespiration (GO:0009853), glutathione metabolism (ko00480), cell redox homeostasis (GO:0045454) and others involved in thermal dissipation and ROS scavenging in leaves of *C. grandis* seedlings exposed to Cu-toxicity

| Accession No.                       | KEGG                                                                                                              | Swiss-Prot                                                                | Log <sub>2</sub> (FC) |
|-------------------------------------|-------------------------------------------------------------------------------------------------------------------|---------------------------------------------------------------------------|-----------------------|
| Photorespiration (GO:0009853)       |                                                                                                                   |                                                                           |                       |
| Cg4g009780                          | Alanine-glyoxylate transaminase / (R)-3-amino-2-methylpropionate-pyruvate transaminase [EC:2.6.1.44 2.6.1.40]     | Alanine--glyoxylate aminotransferase 2 homolog 2, mitochondrial           | 1.357                 |
| Cg6g010200                          | Alanine-glyoxylate transaminase / (R)-3-amino-2-methylpropionate-pyruvate transaminase [EC:2.6.1.44 2.6.1.40]     | Alanine--glyoxylate aminotransferase 2 homolog 3, mitochondrial           | 1.702                 |
| Cg4g021720                          | Ribulose-bisphosphate carboxylase small chain [EC:4.1.1.39]                                                       | Ribulose bisphosphate carboxylase small chain, chloroplastic              | 1.954                 |
| Glutathione metabolism (ko00480)    |                                                                                                                   |                                                                           |                       |
| Cg5g026120                          | Ornithine decarboxylase [EC:4.1.1.17]                                                                             | Ornithine decarboxylase                                                   | -1.980                |
| Cg6g003160                          | Glutathione S-transferase [EC:2.5.1.18]                                                                           | Glutathione S-transferase L3                                              | -1.072                |
| Cg7g012360                          | Glutathione S-transferase [EC:2.5.1.18]                                                                           | Glutathione S-transferase F9                                              | -1.318                |
| Cg8g023290                          | Glutathione S-transferase [EC:2.5.1.18]                                                                           | Glutathione S-transferase U7                                              | -1.268                |
| Cg9g008200                          | Glutathione S-transferase [EC:2.5.1.18]                                                                           | Probable glutathione S-transferase                                        | -1.889                |
| Cg9g008210                          | Glutathione S-transferase [EC:2.5.1.18]                                                                           | Probable glutathione S-transferase                                        | -2.100                |
| Cg9g008220                          | Glutathione S-transferase [EC:2.5.1.18]                                                                           | Probable glutathione S-transferase                                        | -1.754                |
| Cg2g030200                          | Glutathione S-transferase [EC:2.5.1.18]                                                                           | Cyclin-P3-1                                                               | -2.011                |
| Cg8g023310                          | Glutathione S-transferase [EC:2.5.1.18]                                                                           | Probable glutathione S-transferase                                        | 2.050                 |
| Cg6g002810                          | L-ascorbate peroxidase [EC:1.11.1.11]                                                                             | L-ascorbate peroxidase 2, cytosolic                                       | 1.880                 |
| Cg2g031080                          | Leucyl aminopeptidase [EC:3.4.11.1]                                                                               |                                                                           | 1.399                 |
| Cg5g017120                          | Gamma-glutamyltranspeptidase / glutathione hydrolase / leukotriene-C4 hydrolase [EC:2.3.2.2 3.4.19.13 3.4.19.14]; | Glutathione hydrolase 3                                                   | 1.155                 |
| Cell redox homeostasis (GO:0045454) |                                                                                                                   |                                                                           |                       |
| Cg2g023200                          | Thioredoxin 1                                                                                                     | Thioredoxin-like protein CXXS1                                            | -2.322                |
| Cg9g003330                          | Glutaredoxin 3                                                                                                    | Monothiol glutaredoxin-S10                                                | -5.294                |
| Cg9g003340                          | Glutaredoxin 3                                                                                                    | Monothiol glutaredoxin-S2                                                 | -2.265                |
| Cg2g042710                          | Glutaredoxin 3                                                                                                    | Glutaredoxin-C9                                                           | 3.564                 |
| Cg3g022900                          |                                                                                                                   | CBS domain-containing protein CBSX3, mitochondrial                        | 1.571                 |
| Cg3g024580                          | Nucleoredoxin [EC:1.8.1.8]                                                                                        | Probable nucleoredoxin 2                                                  | 1.855                 |
| Cg5g036730                          | Glutaredoxin 3                                                                                                    | Monothiol glutaredoxin-S9                                                 | 2.627                 |
| Cg9g001500                          | Dihydrolipoamide dehydrogenase [EC:1.8.1.4]                                                                       | Dihydrolipoyl dehydrogenase 1, chloroplastic                              | 1.144                 |
| Others                              |                                                                                                                   |                                                                           |                       |
| Cg1g027120                          | Violaxanthin de-epoxidase [EC:1.23.5.1]                                                                           | Violaxanthin de-epoxidase, chloroplastic                                  | 1.227                 |
| Cg7g011780                          | Superoxide dismutase, Fe-Mn family [EC:1.15.1.1]                                                                  | Superoxide dismutase [Fe], chloroplastic                                  | -2.052                |
| Cg8g018870                          | Superoxide dismutase, Cu-Zn family [EC:1.15.1.1]                                                                  | Superoxide dismutase [Cu-Zn], chloroplastic                               | 1.344                 |
| Cg5g009340                          | Copper chaperone for superoxide dismutase                                                                         | Copper chaperone for superoxide dismutase, chloroplastic/cytosolic; AtCCS | 1.588                 |
| Cg3g025260                          | Catalase [EC:1.11.1.6]                                                                                            | Catalase                                                                  | -1.191                |

|            |                          |                               |        |
|------------|--------------------------|-------------------------------|--------|
| Cg1g002980 | Peroxidase [EC:1.11.1.7] | Peroxidase 10                 | 5.291  |
| Cg1g008060 | Peroxidase [EC:1.11.1.7] | Peroxidase 4                  | 1.890  |
| Cg2g001370 | Peroxidase [EC:1.11.1.7] | Peroxidase 15                 | -1.607 |
| Cg2g001400 | Peroxidase [EC:1.11.1.7] | Peroxidase 15                 | -2.280 |
| Cg2g001440 | Peroxidase [EC:1.11.1.7] | Peroxidase 15                 | -3.086 |
|            |                          | {ECO:0000303 PubMed:17936696} |        |
| Cg2g001460 | Peroxidase [EC:1.11.1.7] | Peroxidase C3                 | -4.173 |
| Cg3g005370 | Peroxidase [EC:1.11.1.7] | Peroxidase 15                 | -2.085 |
|            |                          | {ECO:0000303 PubMed:17936696} |        |

**Table S13.** DEGs involved in Ca homeostasis in leaves of *C. grandis* seedlings exposed to Cu-toxicity

| Accession No.                                               | KEGG                                                     | Swiss-Prot                                                                                                            | Log <sub>2</sub> (FC) |
|-------------------------------------------------------------|----------------------------------------------------------|-----------------------------------------------------------------------------------------------------------------------|-----------------------|
| Calcium ion transmembrane transporter activity (GO:0015085) |                                                          |                                                                                                                       |                       |
| Cg5g012700                                                  | Ca <sup>2+</sup> -transporting ATPase [EC:3.6.3.8]       | Calcium-transporting ATPase 9, plasma membrane-type                                                                   | -1.120                |
| Cg2g020060                                                  | Ca <sup>2+</sup> -transporting ATPase [EC:3.6.3.8]       | Calcium-transporting ATPase 12, plasma membrane-type                                                                  | -1.457                |
| Cg5g034830                                                  | Ca <sup>2+</sup> -transporting ATPase [EC:3.6.3.8]       | Calcium-transporting ATPase 12, plasma membrane-type                                                                  | -1.593                |
| Cg3g010620                                                  | Ca <sup>2+</sup> -transporting ATPase [EC:3.6.3.8]       | Calcium-transporting ATPase 12, plasma membrane-type                                                                  | 2.368                 |
| Cg6g003500                                                  | Ca <sup>2+</sup> -transporting ATPase [EC:3.6.3.8]       | Calcium-transporting ATPase 4, endoplasmic reticulum-type                                                             | 1.274                 |
| Cg3g022310                                                  | Calcium uniporter protein, mitochondrial                 | Calcium uniporter protein 2, mitochondrial                                                                            | 2.306                 |
| Cg4g022490                                                  | Glutamate receptor, ionotropic, plant                    | Glutamate receptor 2.8; Ligand-gated ion channel 2.8                                                                  | 2.004                 |
| Cg6g006900                                                  | Ca <sup>2+</sup> :H <sup>+</sup> antiporter              | Vacuolar cation/proton exchanger 3; Ca(2+)/H(+) antiporter CAX3; Ca(2+)/H(+) exchanger 3; Protein CATION EXCHANGER 3; | -1.317                |
| Cg8g024060                                                  | Ca <sup>2+</sup> :H <sup>+</sup> antiporter              | Vacuolar cation/proton exchanger 3; Ca(2+)/H(+) antiporter CAX3; Ca(2+)/H(+) exchanger 3; Protein CATION EXCHANGER 3; | -1.613                |
| Calcium-mediated signaling (GO:0019722)                     |                                                          |                                                                                                                       |                       |
| Cg4g022490                                                  | Glutamate receptor, ionotropic, plant                    | Glutamate receptor 2.8; Ligand-gated ion channel 2.8                                                                  | 2.004                 |
| Cg9g014450                                                  |                                                          | Protein RALF-like 32                                                                                                  | -1.347                |
| Calmodulin binding (GO:0005516)                             |                                                          |                                                                                                                       |                       |
| Cg2g020060                                                  | Ca <sup>2+</sup> -transporting ATPase [EC:3.6.3.8]       | Calcium-transporting ATPase 12, plasma membrane-type                                                                  | -1.457                |
| Cg3g010620                                                  | Ca <sup>2+</sup> -transporting ATPase [EC:3.6.3.8]       | Calcium-transporting ATPase 12, plasma membrane-type                                                                  | 2.368                 |
| Cg5g012700                                                  | Ca <sup>2+</sup> -transporting ATPase [EC:3.6.3.8]       | Calcium-transporting ATPase 9, plasma membrane-type                                                                   | -1.120                |
| Cg5g034830                                                  | Ca <sup>2+</sup> -transporting ATPase [EC:3.6.3.8]       | Calcium-transporting ATPase 12, plasma membrane-type                                                                  | -1.593                |
| Cg2g014880                                                  | Interleukin-1 receptor-associated kinase 4 [EC:2.7.11.1] | G-type lectin S-receptor-like serine/threonine-protein kinase At4g03230                                               | -2.095                |
| Cg3g012090                                                  | Interleukin-1 receptor-associated kinase 4 [EC:2.7.11.1] | G-type lectin S-receptor-like serine/threonine-protein kinase B120                                                    | -3.348                |
| Cg4g002250                                                  | Interleukin-1 receptor-associated kinase 4 [EC:2.7.11.1] | G-type lectin S-receptor-like serine/threonine-protein kinase SD2-5                                                   | -1.361                |
| Cg8g018400                                                  | Interleukin-1 receptor-associated kinase 4 [EC:2.7.11.1] | G-type lectin S-receptor-like serine/threonine-protein kinase At4g03230                                               | -2.581                |
| Cg8g018410                                                  | Chitinase [EC:3.2.1.14]                                  | G-type lectin S-receptor-like serine/threonine-protein kinase CES101                                                  | -2.087                |
| Cg8g018470                                                  | Chitinase [EC:3.2.1.14]                                  | G-type lectin S-receptor-like serine/threonine-                                                                       | -1.937                |

|                                                           |                                                                                                        |                                                                                         |        |
|-----------------------------------------------------------|--------------------------------------------------------------------------------------------------------|-----------------------------------------------------------------------------------------|--------|
| protein kinase At1g11330                                  |                                                                                                        |                                                                                         |        |
| Cg8g010170                                                | Calcium/calmodulin-dependent protein kinase (CaM kinase) II [EC:2.7.11.17]                             | Phosphoenolpyruvate carboxylase kinase 1                                                | 2.727  |
| Cg2g043490                                                | Protein brassinosteroid insensitive 1 [EC:2.7.10.1 2.7.11.1]                                           | Calmodulin-binding receptor kinase CaMRLK {ECO:0000305}                                 | 1.303  |
| Cg3g013020                                                | FK506-binding protein 4/5 [EC:5.2.1.8]                                                                 | Peptidyl-prolyl cis-trans isomerase FKBP62                                              | -7.401 |
| Cg5g006140                                                | E1A/CREB-binding protein [EC:2.3.1.48]                                                                 | BTB/POZ and TAZ domain-containing protein 2                                             | -1.821 |
| Cg5g018340                                                |                                                                                                        | Protein IQ-DOMAIN 1 {ECO:0000303 PubMed:15960618}                                       | -2.010 |
| Cg9g027140                                                | WW domain-containing oxidoreductase                                                                    | Short-chain dehydrogenase TIC 32, chloroplastic                                         | 1.256  |
| Cg9g029620                                                | YTH domain-containing family protein                                                                   | 30-kDa cleavage and polyadenylation specificity factor 30 {ECO:0000303 PubMed:18479511} | 1.074  |
| Calmodulin-dependent protein kinase activity (GO:0004683) |                                                                                                        |                                                                                         |        |
| Cg8g010170                                                | Calcium/calmodulin-dependent protein kinase (CaM kinase) II [EC:2.7.11.17]                             | Phosphoenolpyruvate carboxylase kinase 1                                                | 2.727  |
| Calcium ion binding (GO:0005509)                          |                                                                                                        |                                                                                         |        |
| Cg1g003570                                                | Calcium-binding protein CML                                                                            | Probable calcium-binding protein CML41; Calmodulin-like protein 41                      | -2.486 |
| Cg2g011280                                                | Calcium-binding protein CML                                                                            | Calcium-binding protein CML38; Calmodulin-like protein 38                               | -1.707 |
| Cg3g017200                                                | Calcium-binding protein CML                                                                            | Probable calcium-binding protein CML44; Calmodulin-like protein 44                      | -1.082 |
| Cg6g011100                                                | Calcium-binding protein CML                                                                            | Calcium-binding allergen Bet v 3; Allergen Bet v III;                                   | -1.061 |
| Cg3g021480                                                | Calmodulin                                                                                             | Calmodulin-like protein 5                                                               | -2.843 |
| Cg5g018200                                                | Serine/threonine-protein phosphatase 2B regulatory subunit 1 (RefSeq) calcineurin B-like protein 7 (A) | Calcineurin B-like protein 7                                                            | -1.649 |
| Cg2g022120                                                | Centrin-1                                                                                              | Calcium-binding protein PBP1; KIC-related protein 2; PINOID-binding protein 1           | -1.020 |
| Cg1g015970                                                | Interleukin-1 receptor-associated kinase 4 [EC:2.7.11.1]                                               | Wall-associated receptor kinase-like 10                                                 | 2.024  |
| Cg5g026300                                                | Interleukin-1 receptor-associated kinase 4 [EC:2.7.11.1]                                               | Wall-associated receptor kinase 5                                                       | -3.253 |
| Cg2g024270                                                | Interleukin-1 receptor-associated kinase 4 [EC:2.7.11.1]                                               | Wall-associated receptor kinase-like 2                                                  | -1.330 |
| Cg7g005010                                                | Photosystem II oxygen-evolving enhancer protein 2                                                      | PsbP-like protein 1, chloroplastic                                                      | -1.142 |
| Cg7g012220                                                | Photosystem II oxygen-evolving enhancer protein 2                                                      | Oxygen-evolving enhancer protein 2, chloroplastic                                       | -1.749 |
| Cg2g040770                                                | Photosystem II oxygen-evolving enhancer protein 3                                                      | Oxygen-evolving enhancer protein 3, chloroplastic                                       | -2.463 |
| Cg3g021390                                                | Alpha-amylase [EC:3.2.1.1]                                                                             | Alpha-amylase                                                                           | -2.293 |
| Cg3g024770                                                | Alpha-amylase [EC:3.2.1.1]                                                                             | Probable alpha-amylase 2                                                                | 1.243  |
| Cg3g011670                                                |                                                                                                        |                                                                                         | 1.974  |
| Cg2g030130                                                |                                                                                                        |                                                                                         | -1.401 |
| Cg3g022310                                                | Calcium channel activity (GO:0005262)                                                                  |                                                                                         |        |

|            |                                          |                                                      |       |
|------------|------------------------------------------|------------------------------------------------------|-------|
| Cg4g022490 | Calcium uniporter protein, mitochondrial | Calcium uniporter protein 2, mitochondrial           | 2.306 |
|            | Glutamate receptor, ionotropic, plant    | Glutamate receptor 2.8; Ligand-gated ion channel 2.8 | 2.004 |



**Table S14.** DEGs involved in MAPK signaling pathway - plant (ko04016) in leaves of *C. grandis* seedlings exposed to Cu-toxicity

| Accession No. | KEGG                                                                     | Swiss-Prot                                                               | Log <sub>2</sub> (FC) |
|---------------|--------------------------------------------------------------------------|--------------------------------------------------------------------------|-----------------------|
| Cg3g014360    | Calmodulin                                                               | Rhodanese-like domain-containing protein 6                               | 1.692                 |
| Cg6g017010    | Calmodulin                                                               | Rhodanese-like domain-containing protein 6                               | 1.900                 |
| Cg3g021480    | Calmodulin                                                               | Calmodulin-like protein 5                                                | -2.843                |
| Cg3g025260    | Catalase [EC:1.11.1.6]                                                   | Catalase                                                                 | -1.191                |
| Cg2g038570    | Mitogen-activated protein kinase<br>kinase 4/5 [EC:2.7.12.2]             | Protein LIGHT-DEPENDENT SHORT<br>HYPOCOTYLS 6                            | 1.067                 |
| Cg9g020900    | LRR receptor-like serine/threonine-<br>protein kinase FLS2 [EC:2.7.11.1] | Receptor kinase-like protein Xa21                                        | 1.870                 |
| Cg4g008420    | LRR receptor-like serine/threonine-<br>protein kinase FLS2 [EC:2.7.11.1] | Leucine-rich repeat extensin-like protein 4                              | -1.176                |
| Cg7g009010    | LRR receptor-like serine/threonine-<br>protein kinase FLS2 [EC:2.7.11.1] | Receptor kinase-like protein Xa21                                        | -1.796                |
| Cg9g006130    | LRR receptor-like serine/threonine-<br>protein kinase FLS2 [EC:2.7.11.1] | Leucine-rich repeat extensin-like protein 6                              | -2.603                |
| Cg9g021300    | LRR receptor-like serine/threonine-<br>protein kinase FLS2 [EC:2.7.11.1] | Probable LRR receptor-like serine/threonine-<br>protein kinase At3g47570 | -1.046                |
| Cg9g021310    | LRR receptor-like serine/threonine-<br>protein kinase FLS2 [EC:2.7.11.1] | Probable LRR receptor-like serine/threonine-<br>protein kinase At3g47570 | -1.066                |
| Cg9g021330    | LRR receptor-like serine/threonine-<br>protein kinase FLS2 [EC:2.7.11.1] | Probable LRR receptor-like serine/threonine-<br>protein kinase At3g47570 | -1.084                |
| Cg9g021360    | LRR receptor-like serine/threonine-<br>protein kinase FLS2 [EC:2.7.11.1] | Probable LRR receptor-like serine/threonine-<br>protein kinase At3g47570 | -1.128                |
| Cg9g021390    | LRR receptor-like serine/threonine-<br>protein kinase FLS2 [EC:2.7.11.1] | Probable LRR receptor-like serine/threonine-<br>protein kinase At3g47570 | -1.131                |
| CgUng003130   | LRR receptor-like serine/threonine-<br>protein kinase FLS2 [EC:2.7.11.1] | LRR receptor-like serine/threonine-protein<br>kinase EFR                 | -4.316                |
| Cg1g015500    | LRR receptor-like serine/threonine-<br>protein kinase FLS2 [EC:2.7.11.1] | LRR receptor-like serine/threonine-protein<br>kinase FLS2                | -1.275                |
| Cg1g015520    | LRR receptor-like serine/threonine-<br>protein kinase FLS2 [EC:2.7.11.1] | LRR receptor-like serine/threonine-protein<br>kinase GSO2                | -1.602                |
| Cg1g015540    | LRR receptor-like serine/threonine-<br>protein kinase FLS2 [EC:2.7.11.1] | Probable LRR receptor-like serine/threonine-<br>protein kinase At3g47570 | -2.467                |
| Cg1g015570    | LRR receptor-like serine/threonine-<br>protein kinase FLS2 [EC:2.7.11.1] | Probable LRR receptor-like serine/threonine-<br>protein kinase At3g47570 | -2.068                |
| Cg1g015670    | LRR receptor-like serine/threonine-<br>protein kinase FLS2 [EC:2.7.11.1] | Probable LRR receptor-like serine/threonine-<br>protein kinase At3g47570 | -1.948                |
| Cg1g015690    | LRR receptor-like serine/threonine-<br>protein kinase FLS2 [EC:2.7.11.1] | Receptor kinase-like protein Xa21                                        | -1.414                |
| Cg1g015720    | LRR receptor-like serine/threonine-<br>protein kinase FLS2 [EC:2.7.11.1] | Probable LRR receptor-like serine/threonine-<br>protein kinase At3g47570 | -2.644                |
| Cg1g020830    | LRR receptor-like serine/threonine-<br>protein kinase FLS2 [EC:2.7.11.1] | Receptor like protein 8                                                  | -2.458                |
| Cg2g023840    | LRR receptor-like serine/threonine-<br>protein kinase FLS2 [EC:2.7.11.1] | Receptor-like protein 12                                                 | -1.593                |
| Cg3g001850    | LRR receptor-like serine/threonine-                                      | Probable LRR receptor-like serine/threonine-                             | -1.535                |

|             |                                                                                                                 |                                                                         |        |
|-------------|-----------------------------------------------------------------------------------------------------------------|-------------------------------------------------------------------------|--------|
| Cg6g012270  | protein kinase FLS2 [EC:2.7.11.1]<br>LRR receptor-like serine/threonine-<br>protein kinase ERECTA [EC:2.7.11.1] | protein kinase At3g47570<br>DNA damage-repair/toleration protein DRT100 | -1.908 |
| Cg5g001390  | Protein phosphatase 2C [EC:3.1.3.16]                                                                            | Probable protein phosphatase 2C 8                                       | 3.181  |
| Cg7g000680  | Protein phosphatase 2C [EC:3.1.3.16]                                                                            | Protein phosphatase 2C 37                                               | 1.252  |
| Cg8g023080  | Protein phosphatase 2C [EC:3.1.3.16]                                                                            | Protein phosphatase 2C 3                                                | 2.730  |
| Cg9g028610  | Protein phosphatase 2C [EC:3.1.3.16]                                                                            | Probable protein phosphatase 2C 8                                       | 1.958  |
| CgUng003480 | Protein phosphatase 2C [EC:3.1.3.16]                                                                            | Protein phosphatase 2C 56                                               | 1.448  |
| Cg1g007240  | Transcription factor MYC2                                                                                       | Transcription factor bHLH25                                             | 8.612  |
| Cg2g040740  | Transcription factor MYC2                                                                                       | Transcription factor ILR3                                               | -1.273 |
| Cg1g008410  | Pathogenesis-related protein 1                                                                                  | Basic form of pathogenesis-related protein 1                            | 7.160  |
| Cg6g009750  | Abscisic acid receptor PYR/PYL family                                                                           | Abscisic acid receptor PYL4                                             | -2.059 |
| Cg7g002520  | Abscisic acid receptor PYR/PYL family                                                                           | Abscisic acid receptor PYL4                                             | -2.222 |
| Cg9g008980  | Ethylene-insensitive protein 3                                                                                  | Phosphate transporter PHO1                                              | 1.909  |
| Cg4g007230  | EIN3-binding F-box protein                                                                                      | EIN3-binding F-box protein 1                                            | -1.226 |
| Cg1g000850  | Basic endochitinase B [EC:3.2.1.14]                                                                             | Basic endochitinase                                                     | -3.753 |
| Cg8g000790  | Basic endochitinase B [EC:3.2.1.14]                                                                             | Endochitinase                                                           | -4.533 |
| Cg8g000800  | Basic endochitinase B [EC:3.2.1.14]                                                                             | Endochitinase                                                           | -4.480 |

**Table S15.** DEGs involved in plant hormone signal transduction (ko04075) in leaves of *C. grandis* seedlings exposed to Cu-toxicity

| Accession No.   | KEGG                                                         | Swiss-Prot                                                         | Log <sub>2</sub> (FC) |
|-----------------|--------------------------------------------------------------|--------------------------------------------------------------------|-----------------------|
| Auxin           |                                                              |                                                                    |                       |
| Cg6g006550      | Auxin influx carrier (AUX1 LAX family)                       | Auxin transporter-like protein 2                                   | -1.560                |
| Cg4g002180      | Auxin-responsive protein IAA                                 | Auxin-responsive protein IAA29                                     | 3.122                 |
| Cg4g006940      | Auxin-responsive protein IAA                                 | Auxin-responsive protein IAA29                                     | 2.241                 |
| Cg4g021810      | Auxin-responsive protein IAA                                 | Auxin-responsive protein IAA33                                     | 1.792                 |
| Cg5g036600      | Auxin response factor                                        | Auxin response factor 7                                            | 9.405                 |
| CgUng005390     | SAUR family protein                                          | Auxin-responsive protein SAUR24 {ECO:0000305}                      | -1.813                |
| Cytokinin       |                                                              |                                                                    |                       |
| Cg1g013900      | Histidine-containing phosphotransfer protein                 | Histidine-containing phosphotransfer protein 4                     | 6.555                 |
| Cg8g005300      | Two-component response regulator ARR-B family                | Myb family transcription factor EFM {ECO:0000303 PubMed:25132385}  | -1.061                |
| Gibberellin     |                                                              |                                                                    |                       |
| Cg2g032630      | Phytochrome-interacting factor 3                             | Transcription factor bHLH149                                       | 1.435                 |
| Cg6g013650      | Gibberellin receptor GID1 [EC:3.-.-.]                        | Probable carboxylesterase 15                                       | 1.352                 |
| Cg3g006980      | Gibberellin receptor GID1 [EC:3.-.-.]                        | Probable carboxylesterase 6                                        | 2.007                 |
| Cg5g009820      | DELLA protein                                                | Scarecrow-like protein 28                                          | 2.092                 |
| Cg1g006390      | DELLA protein                                                | Scarecrow-like protein 32                                          | 4.915                 |
| Cg9g001400      | DELLA protein                                                | DELLA protein RGL2                                                 | -5.213                |
| Cg9g001430      | DELLA protein                                                | DELLA protein RGL2                                                 | 3.503                 |
| Abscisic acid   |                                                              |                                                                    |                       |
| Cg6g015730      | ABA responsive element binding factor                        | Protein ABSCISIC ACID-INSENSITIVE 5                                | 3.881                 |
| Cg5g001390      | Protein phosphatase 2C [EC:3.1.3.16]                         | Probable protein phosphatase 2C 8                                  | 3.181                 |
| Cg7g000680      | Protein phosphatase 2C [EC:3.1.3.16]                         | Protein phosphatase 2C 37                                          | 1.252                 |
| Cg8g023080      | Protein phosphatase 2C [EC:3.1.3.16]                         | Protein phosphatase 2C 3                                           | 2.730                 |
| Cg9g028610      | Protein phosphatase 2C [EC:3.1.3.16]                         | Probable protein phosphatase 2C 8                                  | 1.958                 |
| CgUng003480     | Protein phosphatase 2C [EC:3.1.3.16]                         | Protein phosphatase 2C 56                                          | 1.448                 |
| Cg6g009750      | Absciscic acid receptor PYR/PYL family                       | Absciscic acid receptor PYL4                                       | -2.059                |
| Cg7g002520      | Absciscic acid receptor PYR/PYL family                       | Absciscic acid receptor PYL4                                       | -2.222                |
| Ethylene        |                                                              |                                                                    |                       |
| Cg2g038570      | Mitogen-activated protein kinase kinase 4/5 [EC:2.7.12.2]    | Protein LIGHT-DEPENDENT SHORT HYPOCOTYLS 6                         | 1.067                 |
| Cg9g008980      | Ethylene-insensitive protein 3                               | Phosphate transporter PHO1                                         | 1.909                 |
| Cg4g007230      | EIN3-binding F-box protein                                   | EIN3-binding F-box protein 1                                       | -1.226                |
| Brassinosteroid |                                                              |                                                                    |                       |
| Cg3g020940      | Cyclin D3, plant                                             | Cyclin-D3-1                                                        | 2.052                 |
| Cg2g043490      | Protein brassinosteroid insensitive 1 [EC:2.7.10.1 2.7.11.1] | Calmodulin-binding receptor kinase CaMRLK {ECO:0000305}            | 1.303                 |
| Cg1g026820      | Protein brassinosteroid insensitive 1 [EC:2.7.10.1 2.7.11.1] | Protein BRASSINOSTEROID INSENSITIVE 1 {ECO:0000303 PubMed:9298904} | -1.285                |
| Cg3g021510      | BRI1 kinase inhibitor 1                                      | BRI1 kinase inhibitor 1                                            | -1.439                |
| Jasmonic acid   |                                                              |                                                                    |                       |
| Cg1g007240      | Transcription factor MYC2                                    | Transcription factor bHLH25                                        | 8.612                 |
| Cg2g040740      | Transcription factor MYC2                                    | Transcription factor ILR3                                          | -1.273                |

| Salicylic acid |                                |                                                                            |        |
|----------------|--------------------------------|----------------------------------------------------------------------------|--------|
| Cg8g014140     | Transcription factor TGA       | Transcription factor TGA9<br>{ECO:0000303 PubMed:20805327}                 | 1.538  |
| Cg1g008410     | Pathogenesis-related protein 1 | Basic form of pathogenesis-related protein 1                               | 7.160  |
| Cg7g012290     | Regulatory protein NPR1        | BTB/POZ domain and ankyrin repeat-containing<br>protein NPR2 {ECO:0000305} | -1.389 |
| Cg7g012320     | Regulatory protein NPR1        | BTB/POZ domain and ankyrin repeat-containing<br>protein NPR2 {ECO:0000305} | -2.602 |

**Table S16.** DEGs involved in hormone activated and/or mediated signaling pathways in leaves of *C. grandis* seedlings exposed to Cu-toxicity

| Accession No.                                            | KEGG                                                                            | Swiss-Prot                                                           | Log <sub>2</sub> (FC) |
|----------------------------------------------------------|---------------------------------------------------------------------------------|----------------------------------------------------------------------|-----------------------|
| Auxin-activated signaling pathway (GO:0009734)           |                                                                                 |                                                                      |                       |
| Cg1g000490                                               | Uncharacterized protein                                                         | Protein PIN-LIKES 5<br>{ECO:0000303 PubMed:22504182}                 | 1.367                 |
| Cg1g010480                                               |                                                                                 | Auxin-binding protein ABP19a                                         | -1.866                |
| Cg1g012930                                               | ATP-binding cassette, subfamily B (MDR/TAP), member 1 [EC:3.6.3.44]             | ABC transporter B family member 19                                   | -2.700                |
| Cg6g024720                                               | ATP-binding cassette, subfamily B (MDR/TAP), member 1 [EC:3.6.3.44]             | ABC transporter B family member 19                                   | 1.122                 |
| Cg1g021380                                               |                                                                                 | Probable N-acetyltransferase HLS1                                    | 1.638                 |
| Cg3g017880                                               | Auxin efflux carrier family                                                     | Auxin efflux carrier component 6<br>{ECO:0000303 PubMed:15817418}    | 7.737                 |
| Cg6g017830                                               | Auxin efflux carrier family                                                     | Probable auxin efflux carrier component 1c<br>{ECO:0000305}          | 2.613                 |
| Cg3g023440                                               | Integrin-linked kinase-associated serine/threonine phosphatase 2C [EC:3.1.3.16] | Protein WALLS ARE THIN 1                                             | 2.919                 |
| Cg4g002180                                               | Auxin-responsive protein IAA                                                    | Auxin-responsive protein IAA29                                       | 3.122                 |
| Cg4g006940                                               | Auxin-responsive protein IAA                                                    | Auxin-responsive protein IAA29                                       | 2.241                 |
| Cg4g021810                                               | Auxin-responsive protein IAA                                                    | Auxin-responsive protein IAA33                                       | 1.792                 |
| Cg5g036600                                               | Auxin response factor                                                           | Auxin response factor 7                                              | 9.405                 |
| Cg6g006550                                               | Auxin influx carrier (AUX1 LAX family)                                          | Auxin transporter-like protein 2                                     | -1.560                |
| CgUng005390                                              | SAUR family protein                                                             | Auxin-responsive protein SAUR24<br>{ECO:0000305}                     | -1.813                |
| Cg4g018940                                               |                                                                                 | Protein BIG GRAIN 1-like B {ECO:0000305}                             | 1.824                 |
| Cg5g006140                                               | E1A/CREB-binding protein [EC:2.3.1.48]                                          | BTB/POZ and TAZ domain-containing protein 2                          | -1.821                |
| Cg5g016500                                               | Protein-serine/threonine kinase [EC:2.7.11.-]                                   | Serine/threonine-protein kinase WAG1                                 | -1.725                |
| Cg6g009060                                               |                                                                                 | Auxin-induced in root cultures protein 12                            | -1.012                |
| Cg7g016040                                               |                                                                                 | Protein BIG GRAIN 1-like E {ECO:0000305}                             | -2.521                |
| Gibberellic acid mediated signaling pathway (GO:0009740) |                                                                                 |                                                                      |                       |
| Cg3g022490                                               | Beta-galactosidase [EC:3.2.1.23]                                                | Protein indeterminate-domain 1<br>{ECO:0000303 PubMed:16784536}      | 1.026                 |
| Cg4g022720                                               |                                                                                 | Transcription factor IBH1-like 1<br>{ECO:0000303 PubMed:24505057}    | -2.837                |
| Cg7g019960                                               | Xyloglucan glycosyltransferase 4 [EC:2.4.1.-]                                   | Gibberellin-regulated protein 14                                     | 5.707                 |
| Cg8g005300                                               | Two-component response regulator ARR-B family                                   | Myb family transcription factor EFM<br>{ECO:0000303 PubMed:25132385} | -1.061                |
| Cg8g023080                                               | Protein phosphatase 2C [EC:3.1.3.16]                                            | Protein phosphatase 2C 3                                             | 2.730                 |
| Cg9g001400                                               | DELLA protein                                                                   | DELLA protein RGL2                                                   | -5.213                |
| Cg9g001430                                               | DELLA protein                                                                   | DELLA protein RGL2                                                   | 3.503                 |
| Ethylene-activated signaling pathway (GO:0009873)        |                                                                                 |                                                                      |                       |
| Cg1g013070                                               | Acetylajmaline esterase [EC:3.1.1.80]                                           | GDSL esterase/lipase 1<br>{ECO:0000303 PubMed:16126835}              | 1.365                 |

|                                                         |                                                                                   |                                                                       |        |
|---------------------------------------------------------|-----------------------------------------------------------------------------------|-----------------------------------------------------------------------|--------|
| Cg3g017880                                              | Auxin efflux carrier family                                                       | Auxin efflux carrier component 6<br>{ECO:0000303 PubMed:15817418}     | 7.737  |
| Cg5g001740                                              | Pathogenesis-related genes<br>transcriptional activator PTI6                      | Ethylene-responsive transcription factor CRF2                         | 1.867  |
| Cg1g019920                                              | EREBP-like factor                                                                 | Ethylene-responsive transcription factor ERF003                       | 2.059  |
| Cg3g005210                                              |                                                                                   | Ethylene-responsive transcription factor WRI1                         | 2.575  |
| Cg4g017840                                              | EREBP-like factor                                                                 | Ethylene-responsive transcription factor ERF016                       | 1.591  |
| Cg4g004100                                              | EREBP-like factor                                                                 | Dehydration-responsive element-binding protein<br>3                   | 1.644  |
| Cg4g015400                                              | EREBP-like factor                                                                 | Ethylene-responsive transcription factor ERF035                       | -1.807 |
| Cg4g001690                                              | EREBP-like factor                                                                 | Ethylene-responsive transcription factor ERF003                       | -2.375 |
| Cg5g037790                                              | EREBP-like factor                                                                 | Ethylene-responsive transcription factor RAP2-3                       | -3.275 |
| Cg5g044100                                              | EREBP-like factor                                                                 | Ethylene-responsive transcription factor ERF034                       | -1.565 |
| Cg5g044340                                              | EREBP-like factor                                                                 | Ethylene-responsive transcription factor 13                           | -1.305 |
| Cg7g014820                                              | RAV-like factor                                                                   | AP2/ERF and B3 domain-containing transcription<br>repressor RAV2      | -2.294 |
| Cg9g022880                                              | EREBP-like factor                                                                 | Ethylene-responsive transcription factor ERF106                       | -1.269 |
| Cg4g007230                                              | EIN3-binding F-box protein                                                        | EIN3-binding F-box protein 1                                          | -1.226 |
|                                                         | Brassinosteroid mediated signaling pathway (GO:0009742)                           |                                                                       |        |
| Cg1g026820                                              | Protein brassinosteroid insensitive 1<br>[EC:2.7.10.1 2.7.11.1]                   | Protein BRASSINOSTEROID INSENSITIVE 1<br>{ECO:0000303 PubMed:9298904} | -1.285 |
| Cg1g028040                                              | Somatic embryogenesis receptor kinase<br>1 [EC:2.7.10.1 2.7.11.1]                 | LRR receptor kinase BAK1 {ECO:0000305}                                | -2.102 |
| Cg3g021510                                              | BRI1 kinase inhibitor 1                                                           | BRI1 kinase inhibitor 1                                               | -1.439 |
| Cg4g022720                                              |                                                                                   | Transcription factor IBH1-like 1<br>{ECO:0000303 PubMed:24505057}     | -2.837 |
| Cg5g009820                                              | DELLA protein                                                                     | Scarecrow-like protein 28                                             | 2.092  |
| Cg9g005160                                              |                                                                                   | Probable membrane-associated kinase regulator 1                       | 1.083  |
| Absciscic acid-activated signaling pathway (GO:0009738) |                                                                                   |                                                                       |        |
| Cg1g001510                                              | Oomolality two-component system,<br>sensor histidine kinase NIK1<br>[EC:2.7.13.3] | Histidine kinase 1                                                    | 3.571  |
| Cg1g007430                                              | AP-1 complex subunit beta-1                                                       | Glycine-rich domain-containing protein 1<br>{ECO:0000303 Ref.4}       | -1.659 |
| Cg1g012650                                              | Ras-related C3 botulinum toxin<br>substrate 1                                     | Ras-related C3 botulinum toxin substrate 1                            | 2.152  |
| Cg2g041170                                              | Potein FLOWERING LOCUS T                                                          | Protein MOTHER of FT and TFL1                                         | 2.386  |
| Cg3g013260                                              | Hmeobox-leucine zipper protein                                                    | Homeobox-leucine zipper protein HAT22                                 | -2.487 |
| Cg3g020400                                              | E3 ubiquitin-protein ligase RNF181<br>[EC:2.3.2.27]                               | E3 ubiquitin-protein ligase AIP2                                      | 6.069  |
| Cg4g014320                                              | AarF domain-containing kinase                                                     | Transcription factor SRM1 {ECO:0000305}                               | 1.398  |
| Cg5g006140                                              | E1A/CREB-binding protein<br>[EC:2.3.1.48]                                         | BTB/POZ and TAZ domain-containing protein 2                           | -1.821 |
| Cg5g035910                                              |                                                                                   | EID1-like F-box protein 3                                             | 2.693  |
| Cg6g009750                                              | Abscisic acid receptor PYR/PYL family                                             | Abscisic acid receptor PYL4                                           | -2.059 |
| Cg6g015730                                              | ABA responsive element binding factor                                             | Protein ABSCISIC ACID-INSENSITIVE 5                                   | 3.881  |
| Cg7g000680                                              | Protein phosphatase 2C [EC:3.1.3.16]                                              | Protein phosphatase 2C 37                                             | 1.252  |
| Cg7g002520                                              | Abscisic acid receptor PYR/PYL family                                             | Abscisic acid receptor PYL4                                           | -2.222 |



|                                                        |                                                           |                                                                                         |        |
|--------------------------------------------------------|-----------------------------------------------------------|-----------------------------------------------------------------------------------------|--------|
| Cg8g023080                                             | Protein phosphatase 2C [EC:3.1.3.16]                      | Protein phosphatase 2C 3                                                                | 2.730  |
| Cg9g026770                                             |                                                           | Low-temperature-induced 65 kDa protein                                                  | 1.431  |
| CgUng002190                                            | AarF domain-containing kinase                             | Transcription factor SRM1 {ECO:0000305}                                                 | -1.326 |
| CgUng003480                                            | Protein phosphatase 2C [EC:3.1.3.16]                      | Protein phosphatase 2C 56                                                               | 1.448  |
| Salicylic acid mediated signaling pathway (GO:0009863) |                                                           |                                                                                         |        |
| Cg2g042710                                             | Glutaredoxin 3                                            | Glutaredoxin-C9                                                                         | 3.564  |
| Cg7g006930                                             | (R)-mandelonitrile lyase [EC:4.1.2.10]                    | Salicylic acid-binding protein 2                                                        | 1.429  |
| Cg9g029620                                             | YTH domain-containing family protein                      | 30-kDa cleavage and polyadenylation specificity factor 30 {ECO:0000303 PubMed:18479511} | 1.074  |
| Cg8g007780                                             | Mitochondrial chaperone BCS1                              | Protein HYPER-SENSITIVITY-RELATED 4                                                     | -2.370 |
| Cytokinin-activated signaling pathway (GO:0009736)     |                                                           |                                                                                         |        |
| Cg1g013900                                             | Histidine-containing phosphotransfer protein              | Histidine-containing phosphotransfer protein 4                                          | 6.555  |
| Cg5g001740                                             | Pathogenesis-related genes transcriptional activator PTI6 | Ethylene-responsive transcription factor CRF2                                           | 1.867  |
| Jasmonic acid mediated signaling pathway (GO:0009867)  |                                                           |                                                                                         |        |
| Cg2g042710                                             | Glutaredoxin 3                                            | Glutaredoxin-C9                                                                         | 3.564  |

**Table S17.** DEGs involved in hormone metabolism in leaves of *C. grandis* seedlings exposed to Cu-toxicity

| Accession No.                                    | KEGG                                                                            | Swiss-Prot                                                    | Log <sub>2</sub> (FC) |
|--------------------------------------------------|---------------------------------------------------------------------------------|---------------------------------------------------------------|-----------------------|
| Absciscic acid metabolic process (GO:0009687)    |                                                                                 |                                                               |                       |
| Cg1g001690                                       | Cytochrome P450 family 26 subfamily A                                           | Absciscic acid 8'-hydroxylase 1                               | 6.219                 |
| Cg4g014320                                       | AarF domain-containing kinase                                                   | Transcription factor SRM1 {ECO:0000305}                       | 1.398                 |
| CgUng002190                                      | AarF domain-containing kinase                                                   | Transcription factor SRM1 {ECO:0000305}                       | -1.326                |
| Cg2g044950                                       | 9-cis-epoxycarotenoid dioxygenase [EC:1.13.11.51]                               | 9-cis-epoxycarotenoid dioxygenase NCED1, chloroplastic        | -3.481                |
| Cg4g002980                                       | Zeaxanthin epoxidase [EC:1.14.15.21]                                            | Zeaxanthin epoxidase, chloroplastic                           | -1.171                |
| Absciscic acid biosynthetic process (GO:0009688) |                                                                                 |                                                               |                       |
| Cg2g044950                                       | 9-cis-epoxycarotenoid dioxygenase [EC:1.13.11.51]                               | 9-cis-epoxycarotenoid dioxygenase NCED1, chloroplastic        | -3.481                |
| Cg4g002980                                       | Zeaxanthin epoxidase [EC:1.14.15.21]                                            | Zeaxanthin epoxidase, chloroplastic                           | -1.171                |
| CgUng002190                                      | AarF domain-containing kinase                                                   | Transcription factor SRM1 {ECO:0000305}                       | -1.326                |
| Cg4g014320                                       | AarF domain-containing kinase                                                   | Transcription factor SRM1 {ECO:0000305}                       | 1.398                 |
| Cytokinin metabolic process (GO:0009690)         |                                                                                 |                                                               |                       |
| Cg3g023850                                       | Uncharacterized protein                                                         | Cytokinin riboside 5'-monophosphate phosphoribohydrolase LOG7 | 2.170                 |
| Cg5g004060                                       | Cytokinin dehydrogenase [EC:1.5.99.12]                                          | Cytokinin dehydrogenase 1                                     | 1.246                 |
| Cg7g022650                                       | Cytokinin dehydrogenase [EC:1.5.99.12]                                          | Cytokinin dehydrogenase 6                                     | -1.092                |
| Cg4g018790                                       | Cytokinin dehydrogenase [EC:1.5.99.12]                                          | Cytokinin dehydrogenase 7                                     | -2.115                |
| Cytokinin biosynthetic process (GO:0009691)      |                                                                                 |                                                               |                       |
| Cg3g023850                                       | Uncharacterized protein                                                         | Cytokinin riboside 5'-monophosphate phosphoribohydrolase LOG7 | 2.170                 |
| Auxin metabolic process (GO:0009850)             |                                                                                 |                                                               |                       |
| Cg1g003960                                       | Indole-3-pyruvate monooxygenase [EC:1.14.13.168]                                | Indole-3-pyruvate monooxygenase YUCCA2                        | 2.300                 |
| Cg2g013180                                       | Pathogen-inducible salicylic acid glucosyltransferase [EC:2.4.1.-]              | UDP-glycosyltransferase 74E2                                  | 2.959                 |
| Cg3g023440                                       | Integrin-linked kinase-associated serine/threonine phosphatase 2C [EC:3.1.3.16] | Protein WALLS ARE THIN 1                                      | 2.919                 |
| Cg5g030310                                       | Cytochrome P450 family 71 subfamily A                                           | Cytochrome P450 83B1                                          | 3.608                 |
| Cg7g004010                                       | Pheophorbide [EC:3.1.1.82]                                                      | Methylesterase 17                                             | 2.698                 |
| Cg8g024170                                       | Phosphatidylinositol phospholipase C, delta [EC:3.1.4.11]                       | Phosphoinositide phospholipase C 2                            | 2.238                 |
| Cg4g021380                                       | Gibberellin 2-oxidase [EC:1.14.11.13]                                           | 2-oxoglutarate-dependent dioxygenase DAO                      | -1.022                |
| Cg7g001270                                       | Anthranilate synthase component I [EC:4.1.3.27]                                 | Anthranilate synthase alpha subunit 1, chloroplastic          | -1.583                |
| Auxin biosynthetic process (GO:0009851)          |                                                                                 |                                                               |                       |
| Cg1g003960                                       | Indole-3-pyruvate monooxygenase [EC:1.14.13.168]                                | Indole-3-pyruvate monooxygenase YUCCA2                        | 2.300                 |
| Cg3g023440                                       | Integrin-linked kinase-associated serine/threonine phosphatase 2C [EC:3.1.3.16] | Protein WALLS ARE THIN 1                                      | 2.919                 |
| Cg5g030310                                       | Cytochrome P450 family 71 subfamily A                                           | Cytochrome P450 83B1                                          | 3.608                 |
| Cg8g024170                                       | Phosphatidylinositol phospholipase C,                                           | Phosphoinositide phospholipase C 2                            | 2.238                 |

|                                                   |                                                                                                     |                                                                   |        |
|---------------------------------------------------|-----------------------------------------------------------------------------------------------------|-------------------------------------------------------------------|--------|
| delta [EC:3.1.4.11]                               |                                                                                                     |                                                                   |        |
| Cg7g001270                                        | Anthranilate synthase component I<br>[EC:4.1.3.27]                                                  | Anthranilate synthase alpha subunit 1,<br>chloroplastic           | -1.583 |
| Auxin transport (GO:0060918)                      |                                                                                                     |                                                                   |        |
| Cg7g021600                                        | Golgi-specific brefeldin A-resistance<br>guanine nucleotide exchange factor 1                       | ARF guanine-nucleotide exchange factor<br>GNOM                    | 1.069  |
| Cg6g017830                                        | Auxin efflux carrier family                                                                         | Probable auxin efflux carrier component 1c<br>{ECO:0000305}       | 2.613  |
| Cg3g017880                                        | Auxin efflux carrier family                                                                         | Auxin efflux carrier component 6<br>{ECO:0000303 PubMed:15817418} | 7.737  |
| Cg3g023440                                        | Integrin-linked kinase-associated<br>serine/threonine phosphatase 2C<br>[EC:3.1.3.16]               | Protein WALLS ARE THIN 1                                          | 2.919  |
| Cg4g018940                                        |                                                                                                     | Protein BIG GRAIN 1-like B {ECO:0000305}                          | 1.824  |
| Cg4g024570                                        | 5'-AMP-activated protein kinase, catalytic<br>alpha subunit [EC:2.7.11.11]                          | CBL-interacting serine/threonine-protein kinase<br>6              | 1.132  |
| Cg6g024720                                        | ATP-binding cassette, subfamily B<br>(MDR/TAP), member 1 [EC:3.6.3.44]                              | ABC transporter B family member 19                                | 1.122  |
| Cg1g012930                                        | ATP-binding cassette, subfamily B<br>(MDR/TAP), member 1 [EC:3.6.3.44]                              | ABC transporter B family member 19                                | -2.700 |
| Cg7g016040                                        |                                                                                                     | Protein BIG GRAIN 1-like E {ECO:0000305}                          | -2.521 |
| Cg5g016500                                        | Protein-serine/threonine kinase<br>[EC:2.7.11.-]                                                    | Serine/threonine-protein kinase WAG1                              | -1.725 |
| Brassinosteroid biosynthetic process (GO:0016132) |                                                                                                     |                                                                   |        |
| Cg1g001690                                        | Cytochrome P450 family 26 subfamily A                                                               | Abscisic acid 8'-hydroxylase 1                                    | 6.219  |
| Cg1g009640                                        | 3-epi-6-deoxocathasterone 23-<br>monooxygenase [EC:1.14.13.112]                                     | 3-epi-6-deoxocathasterone 23-monooxygenase                        | -1.351 |
| Cg3g021510                                        | BRI1 kinase inhibitor 1                                                                             | BRI1 kinase inhibitor 1                                           | -1.439 |
| Salicylic acid metabolic process (GO:0009696)     |                                                                                                     |                                                                   |        |
| Cg5g021790                                        | Saccharopepsin [EC:3.4.23.25]                                                                       | Aspartic proteinase CDR1                                          | -4.185 |
| Cg5g021820                                        | Saccharopepsin [EC:3.4.23.25]                                                                       | Aspartic proteinase CDR1                                          | -1.398 |
| Cg1g017890                                        | 2'-deoxymugineic-acid 2'-dioxygenase /<br>mugineic-acid 3-dioxygenase<br>[EC:1.14.11.24 1.14.11.25] | Protein DMR6-LIKE OXYGENASE 2<br>{ECO:0000303 PubMed:25376907}    | 8.980  |
| Cg1g017900                                        | 2'-deoxymugineic-acid 2'-dioxygenase /<br>mugineic-acid 3-dioxygenase<br>[EC:1.14.11.24 1.14.11.25] | Protein DMR6-LIKE OXYGENASE 2<br>{ECO:0000303 PubMed:25376907}    | 6.975  |
| Salicylic acid catabolic process (GO:0046244)     |                                                                                                     |                                                                   |        |
| Cg1g017890                                        | 2'-deoxymugineic-acid 2'-dioxygenase /<br>mugineic-acid 3-dioxygenase<br>[EC:1.14.11.24 1.14.11.25] | Protein DMR6-LIKE OXYGENASE 2<br>{ECO:0000303 PubMed:25376907}    | 8.980  |
| Cg1g017900                                        | 2'-deoxymugineic-acid 2'-dioxygenase /<br>mugineic-acid 3-dioxygenase<br>[EC:1.14.11.24 1.14.11.25] | Protein DMR6-LIKE OXYGENASE 2<br>{ECO:0000303 PubMed:25376907}    | 6.975  |
| Jasmonic acid metabolic process (GO:0009694)      |                                                                                                     |                                                                   |        |
| Cg2g037340                                        | E3 ubiquitin-protein ligase<br>ATL10/75/76/77/78 [EC:2.3.2.27]                                      | RING-H2 finger protein ATL73                                      | -2.282 |
| Cg7g007580                                        | OPC-8:0 CoA ligase 1 [EC:6.2.1.-]                                                                   | 4-coumarate--CoA ligase-like 5                                    | 5.062  |
| Cg3g016650                                        | Jasmonoyl-L-amino acid hydrolase                                                                    | IAA-amino acid hydrolase ILR1-like 6                              | 1.585  |

| [EC:3.5.1.127]                                  |                                                                | {ECO:0000303 PubMed:11923288}    |        |
|-------------------------------------------------|----------------------------------------------------------------|----------------------------------|--------|
| Jasmonic acid biosynthetic process (GO:0009695) |                                                                |                                  |        |
| Cg2g037340                                      | E3 ubiquitin-protein ligase<br>ATL10/75/76/77/78 [EC:2.3.2.27] | RING-H2 finger protein ATL73     | -2.282 |
| Cg7g007580                                      | OPC-8:0 CoA ligase 1 [EC:6.2.1.-]                              | 4-coumarate--CoA ligase-like 5   | 5.062  |
| Gibberellin biosynthetic process (GO:0009686)   |                                                                |                                  |        |
| Cg2g023660                                      | Gibberellin 2-oxidase [EC:1.14.11.13]                          | Gibberellin 2-beta-dioxygenase 8 | 3.126  |
| Cg2g044860                                      | Gibberellin 2-oxidase [EC:1.14.11.13]                          | Gibberellin 2-beta-dioxygenase   | 2.853  |

**Table S18.** Specific primer pairs used for qRT-PCR expression analysis

| <b>Genes</b>                                                      | <b>Accession No.</b> | <b>Forward primers (5'→3')</b> | <b>Reverse primers (5'→3')</b> |
|-------------------------------------------------------------------|----------------------|--------------------------------|--------------------------------|
| <i>Vicilin-like seed storage protein At2g18540</i>                | Cg1g003870           | ACTTGACAAAGGGCTCG              | CTGTGCTCGGACAAACC              |
| <i>LanC-like protein GCL1</i>                                     | Cg1g008400           | TAGAGGAGGGATTTACGC             | CCCGAGATGCTTGTTA               |
| <i>Wall-associated receptor kinase-like 10</i>                    | Cg1g015970           | TGGTATTAGCAGGGATT              | ATGATTCCGGTGAAAGAT             |
| <i>NAC domain-containing protein 72</i>                           | Cg2g021360           | TTCAGCCCCAGGGATAG              | CAACCTTACGACCTTCAGT            |
| <i>Bidirectional sugar transporter SWEET16</i>                    | Cg2g031810           | AATGCCGTAGGGTTCGT              | TGTGGGCGGATCTTTCT              |
| <i>Protein CHUP1, chloroplastic</i>                               | Cg2g038560           | TCAAACGACTGCTACAA              | ACTCTGACAACTCTGCTT             |
| <i>Protein MOTHER of FT and TFL1</i>                              | Cg2g041170           | TCAGAAAGCGTTGAGATTG            | TCAGCAGAAGCAGAGGG              |
| <i>Plant cysteine oxidase 1 {ECO:0000303\PubMed:24599061}</i>     | Cg5g031660           | TTTCTTCCTCCAACCTGC             | ACTGTCGGCTATCAACTT             |
| <i>Hypothetical protein CICLE_v10033235mg [Citrus clementina]</i> | Cg7g022450           | GATTTGCGATGCTTGCT              | GGTTCTTGTCACCTTTTC             |
| <i>ATP-dependent zinc metalloprotease FTSH 6, chloroplastic</i>   | Cg6g024950           | AAGCAGTGATGTCGTGA              | TTCCCTGTTATTCCTTATGTG          |
| <i>Pectinesterase 3</i>                                           | Cg1g013250           | GAGTGAAATGGAAGGGAT             | CAAACCAAGGGAGAATG              |
| <i>Lectin</i>                                                     | Cg4g006720           | AAAAGTGGACGAGCAAT              | TCTGGCAGGTAAATGTG              |
| <i>Probable calcium-binding protein CML41</i>                     | Cg1g003570           | AAACTCCTCCTTGTCTGC             | CTTGAAAATCCAATAAACTG           |
| <i>LOB domain-containing protein 39</i>                           | Cg3g012700           | CGCCCGCTCAGTCAAAT              | GCAAGCACGACCTCAGTAT            |
| <i>B-box domain protein 31 {ECO:0000303\PubMed:19920209}</i>      | Cg2g041050           | TGATGACGATGATGGGG              | GATTCTTGCTTTGTTGAG             |
| <i>Gamma-glutamyl peptidase 5 {ECO:0000305}</i>                   | Cg4g023690           | TTCGGGGAAGAAGGAGA              | TAAGGGCTACCGCTGAT              |
| <i>36.4 kDa proline-rich protein</i>                              | Cg6g012200           | GATTCTCCTCTTGAACCTGGGTA        | GGGGTGGCTTGTGATGC              |
| <i>Probable alpha-mannosidase At5g13980 {ECO:0000305}</i>         | Cg7g011170           | GATTCCAGTGGTCGTGA              | TTACTTCCATCGTCTCC              |
| <i>Cyclin-D3-1</i>                                                | Cg3g020940           | TCCTCCTACAGGGTGCC              | TTCAATAGTTGCTTCTCATA           |
| <i>Monothiol glutaredoxin-S2</i>                                  | Cg9g003340           | ATGGCAATGGAGCGAGTA             | CACCGCCGATGAACACG              |
| <i>Endochitinase</i>                                              | Cg8g000800           | TGAAGGCTGCCAAAGTA              | ACCAAAGGCTGGAAG                |
| <i>Actin</i>                                                      | Cg1g026080           | AGAACTATGAACTGCCTGATGGC        | GCTTGGAGCAAGTGCTGTGATT         |
| <i>U4/U6 small nuclear ribonucleoprotein PRP31 (PRPF31)</i>       | Cg7g019550           | ACTCATGGGAACGGCTGGTGGTC        | TCGGCAGGCACGCATCCTTAGAG        |
